# Supplementary material
Source: PubMed Central journal article supplement (PMC6921939)

# PICO 1: In adult patients with ICH occurring during use of VKA (with an INR above normal) does PCC in comparison to placebo, improve outcomes

Author(s):

Date:

Question: PCC compared to Placebo for ICH occurring during use of VKA

Setting:

Bibliography:

| Certainty assessment                                        |                       |                      |               |              |             |                                 | № of patients   |                 | Effect                 |                                                   | Certainty   | Importance |
|-------------------------------------------------------------|-----------------------|----------------------|---------------|--------------|-------------|---------------------------------|-----------------|-----------------|------------------------|---------------------------------------------------|-------------|------------|
| № of studies                                                | Study design          | Risk of bias         | Inconsistency | Indirectness | Imprecision | Other considerations            | PCC             | Placebo         | Relative (95% CI)      | Absolute (95% CI)                                 |             |            |
| Mortality, PCC vs Placebo (follow up: mean 90 days)         |                       |                      |               |              |             |                                 |                 |                 |                        |                                                   |             |            |
| 1                                                           | observational studies | serious <sup>a</sup> | not serious   | not serious  | not serious | strong association <sup>b</sup> | 218/585 (37.3%) | 280/454 (61.7%) | OR 0.37 (0.29 to 0.48) | 244 fewer per 1,000 (from 181 fewer to 299 fewer) | ⊕⊕○○<br>LOW | CRITICAL   |
| Mortality, PCC and FFP vs Placebo (follow up: mean 90 days) |                       |                      |               |              |             |                                 |                 |                 |                        |                                                   |             |            |
| 1                                                           | observational studies | serious <sup>a</sup> | not serious   | not serious  | not serious | strong association              | 36/131 (27.5%)  | 280/454 (61.7%) | OR 0.24 (0.15 to 0.36) | 338 fewer per 1,000 (from 250 fewer to 422 fewer) | ⊕⊕○○<br>LOW | CRITICAL   |

CI: Confidence interval; OR: Odds ratio

## Explanations

a. Significant differences in baseline characteristics between two groups

b. A retrospective pooled analysis of 16 stroke registries from Argentina, Australia, Finland, France, Germany, Italy, the Netherlands, the United Kingdom, and the USA.

Summary of findings:

**PCC compared to Placebo for ICH occurring during use of VKA**

**Patient or population:** ICH occurring during use of VKA

**Setting:**

**Intervention:** PCC

**Comparison:** Placebo

| Outcomes                                                    | Anticipated absolute effects* (95% CI) |                                      | Relative effect (95% CI)         | № of participants (studies)     | Certainty of the evidence (GRADE) | Comments |
|-------------------------------------------------------------|----------------------------------------|--------------------------------------|----------------------------------|---------------------------------|-----------------------------------|----------|
|                                                             | Risk with Placebo                      | Risk with PCC                        |                                  |                                 |                                   |          |
| Mortality, PCC vs Placebo follow up: mean 90 days           | 617 per 1,000                          | <b>373 per 1,000</b><br>(318 to 436) | <b>OR 0.37</b><br>(0.29 to 0.48) | 1039<br>(1 observational study) | ⊕⊕○○<br>LOW <sup>a,b</sup>        |          |
| Mortality, PCC and FFP vs Placebo (follow up: mean 90 days) | 617 per 1,000                          | <b>279 per 1,000</b><br>(194 to 367) | <b>OR 0.24</b><br>(0.15 to 0.36) | 585<br>(1 observational study)  | ⊕⊕○○<br>LOW <sup>a</sup>          |          |

\*The risk in the intervention group (and its 95% confidence interval) is based on the assumed risk in the comparison group and the relative effect of the intervention (and its 95% CI).

CI: Confidence interval; OR: Odds ratio

**GRADE Working Group grades of evidence**

**High certainty:** We are very confident that the true effect lies close to that of the estimate of the effect

**Moderate certainty:** We are moderately confident in the effect estimate: The true effect is likely to be close to the estimate of the effect, but there is a possibility that it is substantially different

**Low certainty:** Our confidence in the effect estimate is limited: The true effect may be substantially different from the estimate of the effect

**Very low certainty:** We have very little confidence in the effect estimate: The true effect is likely to be substantially different from the estimate of effect

**Explanations**

a. Significant differences in baseline characteristics between two groups

b. A retrospective pooled analysis of 16 stroke registries from Argentina, Australia, Finland, France, Germany, Italy, the Netherlands, the United Kingdom, and the USA.

Table: Effect of PCC on all-cause mortality in patients with warfarin-associated intracranial hemorrhage

| Outcome              | Incidence (%)    |                  | n (N)       | OR [95% CI]       | I <sup>2</sup> | P value  |
|----------------------|------------------|------------------|-------------|-------------------|----------------|----------|
|                      | PCC              | Control          |             |                   |                |          |
| PCC vs Control       | 37%<br>(218/585) | 62%<br>(280/454) | 1<br>(1039) | 0.37 [0.29, 0.48] | NA             | <0.00001 |
| PCC & FFP vs Control | 27%<br>(36/131)  | 62%<br>(280/454) | 1<br>(585)  | 0.24 [0.15, 0.36] | NA             | <0.00001 |

FFP: Fresh frozen plasma; I<sup>2</sup>: Heterogeneity; n: Number of studies; N: Number of patients; p: Statistical significance value; PCC: Prothrombin complex concentrate; OR: Odds Ratio

Figure: Effect of PCC on all-cause mortality in patients with warfarin-associated intracranial hemorrhage

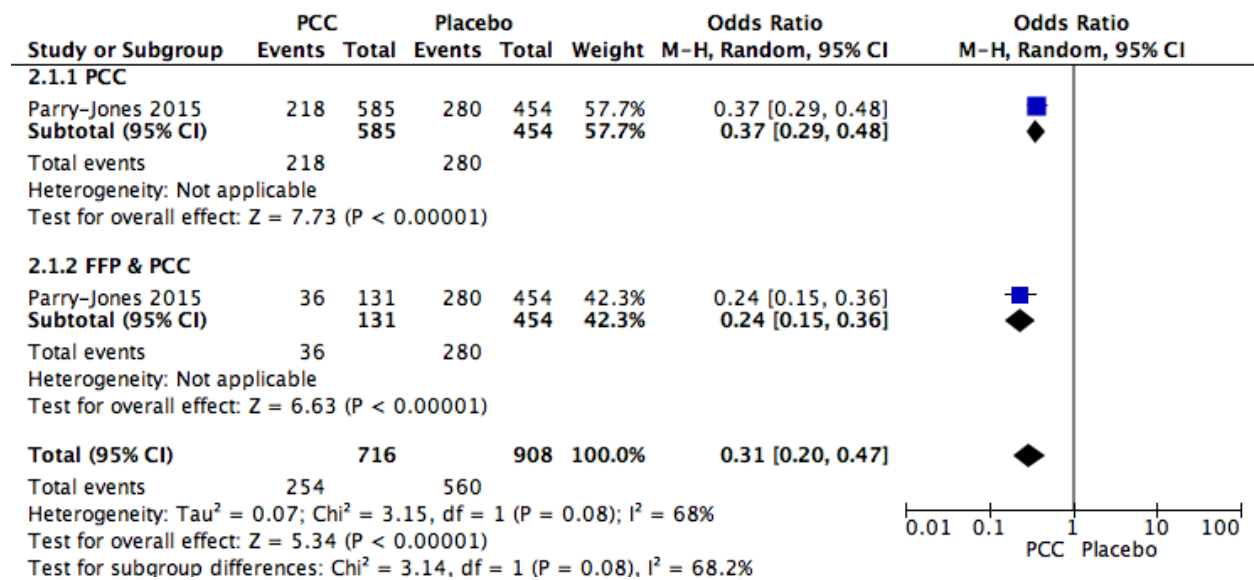

**PICO 2: In adult patients with ICH occurring during use of NOAC (with drug levels assumed relevant for an effective anticoagulatory effect) does PCC in comparison to placebo affect the outcomes**

Author(s):

Date:

Question: PCC compared to Placebo for ICH occurring during use of NOAC

Setting:

Bibliography:

| Certainty assessment                                        |                       |              |               |              |                      |                                                  | № of patients  |               | Effect                  |                                                 | Certainty             | Importance |
|-------------------------------------------------------------|-----------------------|--------------|---------------|--------------|----------------------|--------------------------------------------------|----------------|---------------|-------------------------|-------------------------------------------------|-----------------------|------------|
| № of studies                                                | Study design          | Risk of bias | Inconsistency | Indirectness | Imprecision          | Other considerations                             | PCC            | Placebo       | Relative (95% CI)       | Absolute (95% CI)                               |                       |            |
| Mortality, follow up                                        |                       |              |               |              |                      |                                                  |                |               |                         |                                                 |                       |            |
| 1                                                           | observational studies | not serious  | not serious   | not serious  | serious <sup>a</sup> | publication bias strongly suspected <sup>b</sup> | 9/35 (25.7%)   | 8/26 (30.8%)  | OR 0.78 (0.25 to 2.40)  | 50 fewer per 1,000 (from 208 fewer to 208 more) | ⊕○○○<br>○<br>VERY LOW | CRITICAL   |
| Hematoma Volume increase > 33% and or > 6 ml                |                       |              |               |              |                      |                                                  |                |               |                         |                                                 |                       |            |
| 2                                                           | observational studies | not serious  | not serious   | not serious  | not serious          | publication bias strongly suspected <sup>c</sup> | 47/131 (35.9%) | 19/60 (31.7%) | OR 1.22 (0.64 to 2.34)  | 45 more per 1,000 (from 88 fewer to 204 more)   | ⊕○○○<br>○<br>VERY LOW | IMPORTANT  |
| Hematoma volume                                             |                       |              |               |              |                      |                                                  |                |               |                         |                                                 |                       |            |
| 1                                                           | observational studies | not serious  | not serious   | not serious  | not serious          | publication bias strongly suspected <sup>b</sup> | 28             | 17            | -                       | MD 8.7 mL higher (5.4 lower to 22.8 higher)     | ⊕○○○<br>○<br>VERY LOW | IMPORTANT  |
| Intraventricular extension, New Interventricular hemorrhage |                       |              |               |              |                      |                                                  |                |               |                         |                                                 |                       |            |
| 1                                                           | observational studies | not serious  | not serious   | not serious  | serious <sup>a</sup> | publication bias strongly suspected <sup>b</sup> | 2/28 (7.1%)    | 1/17 (5.9%)   | OR 1.23 (0.10 to 14.70) | 13 more per 1,000 (from 53 fewer to 420 more)   | ⊕○○○<br>○<br>VERY LOW | IMPORTANT  |
|                                                             |                       |              |               |              |                      |                                                  |                | 0.0%          |                         | 0 fewer per 1,000 (from 0 fewer to 0 fewer)     |                       |            |
| Modified Graeb score (change from baseline)                 |                       |              |               |              |                      |                                                  |                |               |                         |                                                 |                       |            |
| 1                                                           | observational studies | not serious  | not serious   | not serious  | not serious          | publication bias strongly suspected <sup>b</sup> | 28             | 17            | -                       | MD 0.5 Score higher (0.74 lower to 1.74 higher) | ⊕○○○<br>○<br>VERY LOW | IMPORTANT  |

| Certainty assessment |                       |              |               |              |                      |                                                  | № of patients |         | Effect            |                                                | Certainty             | Importance |
|----------------------|-----------------------|--------------|---------------|--------------|----------------------|--------------------------------------------------|---------------|---------|-------------------|------------------------------------------------|-----------------------|------------|
| № of studies         | Study design          | Risk of bias | Inconsistency | Indirectness | Imprecision          | Other considerations                             | PCC           | Placebo | Relative (95% CI) | Absolute (95% CI)                              |                       |            |
| Length of stay       |                       |              |               |              |                      |                                                  |               |         |                   |                                                |                       |            |
| 1                    | observational studies | not serious  | not serious   | not serious  | serious <sup>a</sup> | publication bias strongly suspected <sup>b</sup> | 28            | 17      | -                 | MD 3.5 Days higher (0.16 lower to 7.16 higher) | ⊕○○○<br>○<br>VERY LOW |            |

CI: Confidence interval; OR: Odds ratio; MD: Mean difference

## Explanations

- a. Wide CI
- b. Single study to support this outcome
- c. Two studies to support this outcome

Summary of findings:

**PCC compared to Placebo for ICH occurring during use of NOAC**

**Patient or population:** ICH occurring during use of NOAC

**Setting:**

**Intervention:** PCC

**Comparison:** Placebo

| Outcomes                                                    | Anticipated absolute effects* (95% CI)                                  |                                                                                                                                 | Relative effect (95% CI)       | № of participants (studies)   | Certainty of the evidence (GRADE) | Comments |
|-------------------------------------------------------------|-------------------------------------------------------------------------|---------------------------------------------------------------------------------------------------------------------------------|--------------------------------|-------------------------------|-----------------------------------|----------|
|                                                             | Risk with Placebo                                                       | Risk with PCC                                                                                                                   |                                |                               |                                   |          |
| Mortality, follow up                                        | 308 per 1,000                                                           | <b>257 per 1,000</b> (100 to 516)                                                                                               | <b>OR 0.78</b> (0.25 to 2.40)  | 61 (1 observational study)    | ⊕○○○<br>VERY LOW <sup>a,b</sup>   |          |
| Hematoma Volume increase > 33% and or > 6 ml                | 317 per 1,000                                                           | <b>361 per 1,000</b> (229 to 520)                                                                                               | <b>OR 1.22</b> (0.64 to 2.34)  | 191 (2 observational studies) | ⊕○○○<br>VERY LOW <sup>c</sup>     |          |
| Hematoma volume                                             | The mean hematoma volume was <b>0</b> mL                                | The mean hematoma volume in the intervention group was 8.7 mL higher (5.4 lower to 22.8 higher)                                 | -                              | 45 (1 observational study)    | ⊕○○○<br>VERY LOW <sup>b</sup>     |          |
| Intraventricular extension, New Interventricular hemorrhage | <b>Study population</b>                                                 |                                                                                                                                 | <b>OR 1.23</b> (0.10 to 14.70) | 45 (1 observational study)    | ⊕○○○<br>VERY LOW <sup>a,b</sup>   |          |
|                                                             | 59 per 1,000                                                            | <b>71 per 1,000</b> (6 to 479)                                                                                                  |                                |                               |                                   |          |
|                                                             | <b>Moderate</b>                                                         |                                                                                                                                 |                                |                               |                                   |          |
|                                                             | 0 per 1,000                                                             | <b>0 per 1,000</b> (0 to 0)                                                                                                     |                                |                               |                                   |          |
| Modified Graeb score (change from baseline)                 | The mean modified Graeb score (change from baseline) was <b>0</b> Score | The mean modified Graeb score (change from baseline) in the intervention group was 0.5 Score higher (0.74 lower to 1.74 higher) | -                              | 45 (1 observational study)    | ⊕○○○<br>VERY LOW <sup>b</sup>     |          |
| Length of stay                                              | The mean length of stay was <b>0</b> Days                               | The mean length of stay in the intervention group was 3.5 Days higher (0.16 lower to 7.16 higher)                               | -                              | 45 (1 observational study)    | ⊕○○○<br>VERY LOW <sup>a,b</sup>   |          |

Summary of findings:

---

## PCC compared to Placebo for ICH occurring during use of NOAC

---

**Patient or population:** ICH occurring during use of NOAC

**Setting:**

**Intervention:** PCC

**Comparison:** Placebo

| Outcomes | Anticipated absolute effects*<br>(95% CI) |               | Relative effect<br>(95% CI) | № of<br>participants<br>(studies) | Certainty of the<br>evidence<br>(GRADE) | Comments |
|----------|-------------------------------------------|---------------|-----------------------------|-----------------------------------|-----------------------------------------|----------|
|          | Risk with<br>Placebo                      | Risk with PCC |                             |                                   |                                         |          |

\*The risk in the intervention group (and its 95% confidence interval) is based on the assumed risk in the comparison group and the **relative effect** of the intervention (and its 95% CI).

CI: Confidence interval; OR: Odds ratio; MD: Mean difference

---

### GRADE Working Group grades of evidence

**High certainty:** We are very confident that the true effect lies close to that of the estimate of the effect

**Moderate certainty:** We are moderately confident in the effect estimate: The true effect is likely to be close to the estimate of the effect, but there is a possibility that it is substantially different

**Low certainty:** Our confidence in the effect estimate is limited: The true effect may be substantially different from the estimate of the effect

**Very low certainty:** We have very little confidence in the effect estimate: The true effect is likely to be substantially different from the estimate of effect

---

## Explanations

- a. Wide CI
- b. Single study to support this outcome
- c. Two studies to support this outcome

Table: Effect of PCC in patients with NOACs-associated intracranial hemorrhage

| Outcome                                                                       | Incidence (%)   |                | n (N)   | MD [95% CI]/ OR [95% CI] | I <sup>2</sup> | P value |
|-------------------------------------------------------------------------------|-----------------|----------------|---------|--------------------------|----------------|---------|
|                                                                               | PCC             | Nothing        |         |                          |                |         |
| Mortality, within 5 days <sup>1</sup>                                         | 6%<br>(2/35)    | 15%<br>(4/26)  | 1 (61)  | 0.33 [0.06, 1.98]        | NA             | 0.23    |
| Mortality, during acute <sup>1</sup> stay                                     | 17%<br>(6/35)   | 15%<br>(4/26)  | 1 (61)  | 1.14 [0.29, 4.53]        | NA             | 0.85    |
| Mortality, during FU <sup>1</sup>                                             | 26%<br>(9/35)   | 31%<br>(8/26)  | 1 (61)  | 0.78 [0.25, 2.40]        | NA             | 0.66    |
| Length of stay <sup>1</sup>                                                   | 11±6            | 7.5±8          | 1 (61)  | 3.50 [-0.16, 7.16]       | NA             | 0.06    |
| Intraventricular extension                                                    |                 |                |         |                          |                |         |
| New intraventricular hemorrhage <sup>1</sup>                                  | 7%<br>(2/28)    | 6%<br>(1/17)   | 1 (45)  | 1.23 [0.10, 14.70]       | NA             | 0.87    |
| Modified Graeb score (change from baseline, increase ≥ 2 points) <sup>1</sup> | 18%<br>(5/28)   | 0%<br>(0/17)   | 1 (45)  | 8.19 [0.42, 158.15]      | NA             | 0.08    |
| Modified Graeb score (change from baseline) <sup>1</sup>                      | 0±1.5           | -0.5±2.4       | 1 (40)  | 0.50 [-0.74, 1.74]       | NA             | 0.43    |
| Hematoma volume, mL <sup>1</sup>                                              | 23±24.8         | 14.3±22.5      | 1 (45)  | 8.70 [-5.40, 22.80]      |                | 0.23    |
| Hematoma increase                                                             |                 |                |         |                          |                |         |
| Volume increase ≥ 33% <sup>1,2</sup>                                          | 35%<br>(46/131) | 30%<br>(18/60) | 2 (191) | 1.25 [0.65, 2.43]        | 0%             | 0.50    |
| Volume increase ≥ 6 mL <sup>1</sup>                                           | 21%<br>(6/28)   | 6%<br>(1/17)   | 1 (45)  | 4.36 [0.48, 39.89]       | NA             | 0.19    |
| Volume increase ≥ 33% and or ≥ 6 mL <sup>1,2</sup>                            | 36%<br>(47/131) | 32%<br>(19/60) | 2 (191) | 1.22 [0.64, 2.34]        | 0%             | 0.55    |
| ICH volume <sup>3</sup>                                                       | 8.3±7.0         | NR             | 1 (5)   | NA                       | NA             | NA      |
| Effectiveness of PCC <sup>4</sup>                                             | 73%<br>(43/59)  | NR             | 1 (59)  | NA                       | NA             | NA      |
| Expansion of ICH <sup>3</sup>                                                 | 0%<br>(0/5)     | NR             | 1 (5)   | NA                       | NA             | NA      |
| Complications of PCC <sup>3</sup>                                             | 0%<br>(0/5)     | NR             | 1 (5)   | NA                       | NA             | NA      |
| mRS, 3 months <sup>3</sup>                                                    | 1.8±2.4         | NR             | 1 (5)   | NA                       | NA             | NA      |

CI: Confidence interval; I<sup>2</sup>: Heterogeneity; MD: Mean difference; mRS: Modified Rankin Scale; n: Number of studies; N: Number of patients; p: Statistical significance value; PCC: Prothrombin complex concentrate; OR: Odds Ratio; 1: Purrucker 2015; 2: Gerner 2018; 3: Dibu et al 2016; 4: Majeed et al 2017



Figure: Effect of PCC on mortality in patients with NOACs induced hemorrhage

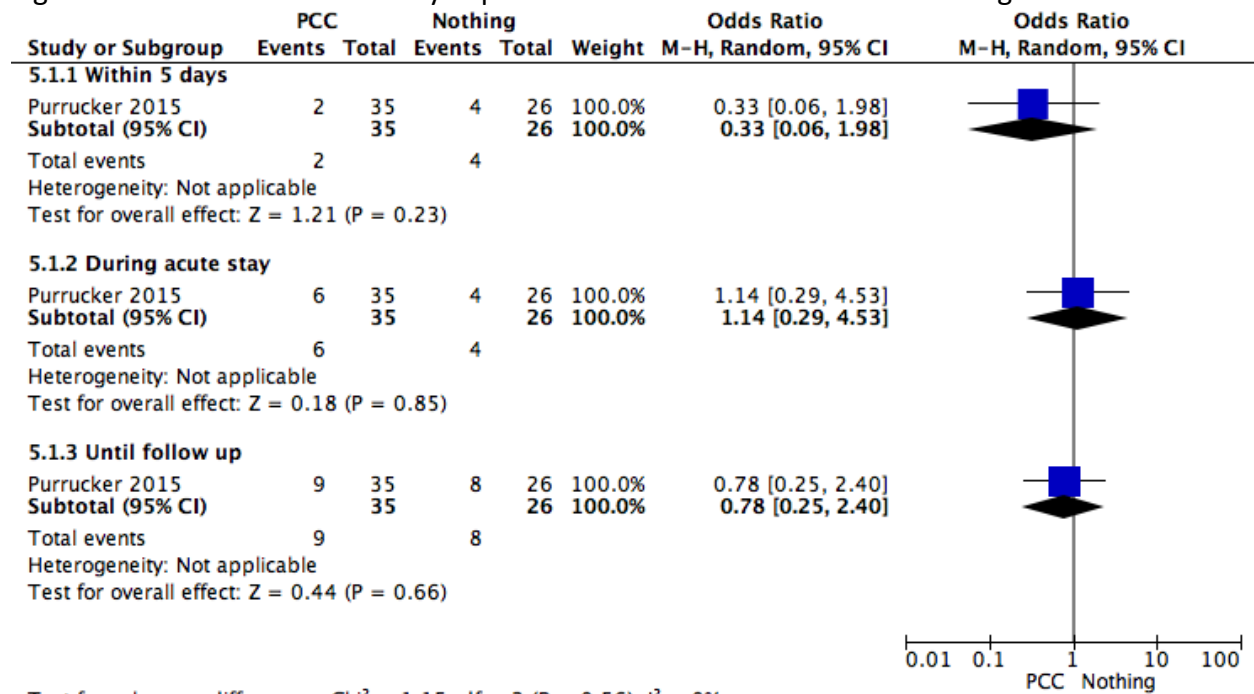

Figure: Effect of PCC on increase of hematoma in patients with NOACs induced hemorrhage

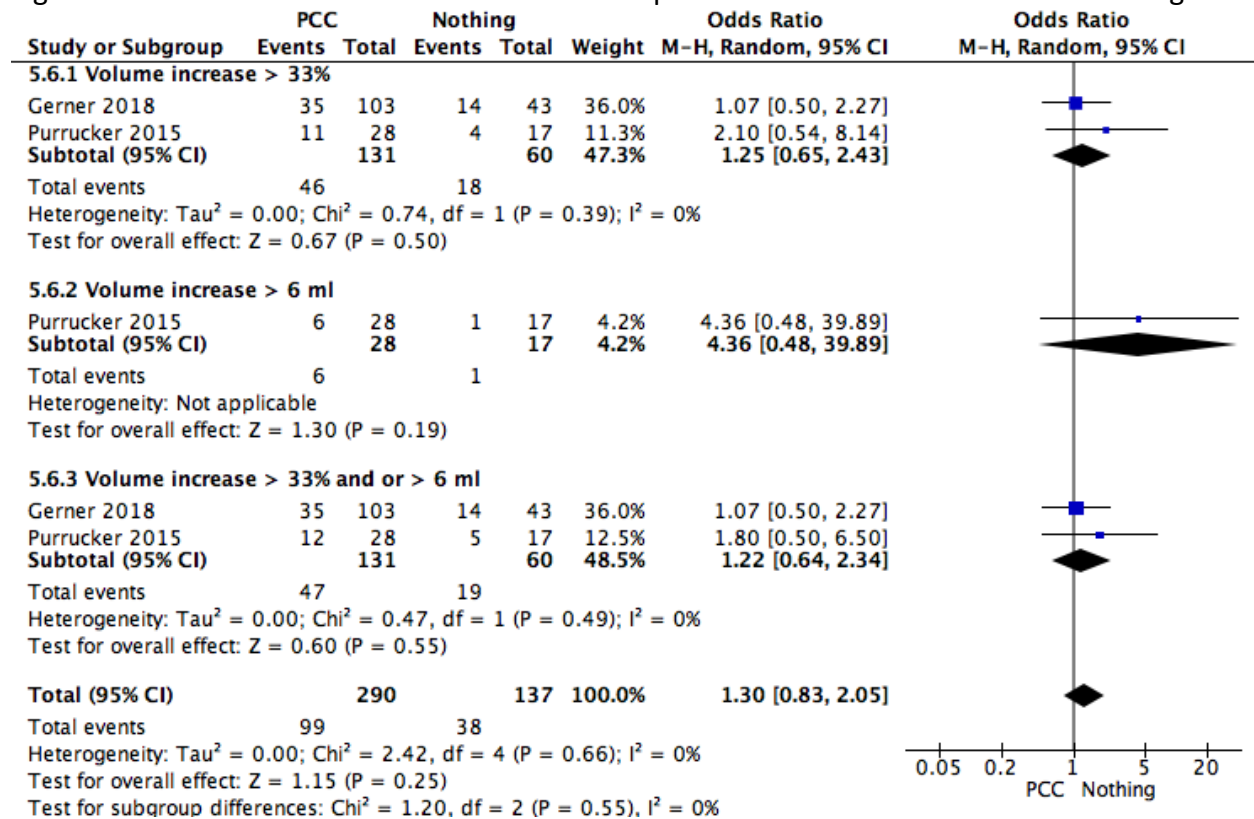

**PICO 3: In adult patients with ICH occurring during use of VKA (with an INR above normal) does PCC in comparison to FFP, improve outcomes**

Author(s):

Date:

Question: PCC compared to FFP for ICH occurring during use of VKA

Setting:

Bibliography:

| Certainty assessment               |                       |              |               |              |             |                                                  | № of patients   |                 | Effect                   |                                                   | Certainty             | Importance |
|------------------------------------|-----------------------|--------------|---------------|--------------|-------------|--------------------------------------------------|-----------------|-----------------|--------------------------|---------------------------------------------------|-----------------------|------------|
| № of studies                       | Study design          | Risk of bias | Inconsistency | Indirectness | Imprecision | Other considerations                             | PCC             | FFP             | Relative (95% CI)        | Absolute (95% CI)                                 |                       |            |
| Mortality                          |                       |              |               |              |             |                                                  |                 |                 |                          |                                                   |                       |            |
| 3                                  | observational studies | not serious  | not serious   | not serious  | not serious | publication bias strongly suspected <sup>a</sup> | 223/612 (36.4%) | 180/400 (45.0%) | OR 0.69 (0.54 to 0.90)   | 89 fewer per 1,000 (from 26 fewer to 144 fewer)   | ⊕○○○<br>○<br>VERY LOW | CRITICAL   |
| Hematoma expansion, at 3 and 24 h  |                       |              |               |              |             |                                                  |                 |                 |                          |                                                   |                       |            |
| 1                                  | randomised trials     | not serious  | not serious   | not serious  | not serious | publication bias strongly suspected <sup>b</sup> | 27              | 23              | -                        | MD 13.89 mL lower (23.45 lower to 4.34 lower)     | ⊕⊕⊕○<br>MODERATE      | IMPORTANT  |
| INR ≤ 1.2, at 3, 7 or 24 h         |                       |              |               |              |             |                                                  |                 |                 |                          |                                                   |                       |            |
| 1                                  | observational studies | not serious  | not serious   | not serious  | not serious | publication bias strongly suspected <sup>b</sup> | 20/23 (87.0%)   | 10/23 (43.5%)   | OR 11.35 (3.52 to 36.55) | 462 more per 1,000 (from 296 more to 531 more)    | ⊕○○○<br>○<br>VERY LOW | IMPORTANT  |
| mRS 0-3, 3 months                  |                       |              |               |              |             |                                                  |                 |                 |                          |                                                   |                       |            |
| 1                                  | randomised trials     | not serious  | not serious   | not serious  | not serious | publication bias strongly suspected <sup>b</sup> | 10/27 (37.0%)   | 9/23 (39.1%)    | RR 0.92 (0.29 to 2.88)   | 31 fewer per 1,000 (from 278 fewer to 736 more)   | ⊕⊕⊕○<br>MODERATE      | IMPORTANT  |
| NIHSS score at day 15 or discharge |                       |              |               |              |             |                                                  |                 |                 |                          |                                                   |                       |            |
| 1                                  | randomised trials     | not serious  | not serious   | not serious  | not serious | publication bias strongly suspected <sup>b</sup> | 27              | 23              | -                        | MD 1.3 Score higher (5 lower to 7.6 higher)       | ⊕⊕⊕○<br>MODERATE      | IMPORTANT  |
| Barthel index at day 90            |                       |              |               |              |             |                                                  |                 |                 |                          |                                                   |                       |            |
| 1                                  | randomised trials     | not serious  | not serious   | not serious  | not serious | publication bias strongly suspected <sup>b</sup> | 27              | 23              | -                        | MD 17.5 Score higher (4.26 lower to 39.26 higher) | ⊕⊕⊕○<br>MODERATE      | IMPORTANT  |

| Certainty assessment                     |                   |              |               |              |             |                                                  | № of patients |     | Effect            |                                                    | Certainty        | Importance |
|------------------------------------------|-------------------|--------------|---------------|--------------|-------------|--------------------------------------------------|---------------|-----|-------------------|----------------------------------------------------|------------------|------------|
| № of studies                             | Study design      | Risk of bias | Inconsistency | Indirectness | Imprecision | Other considerations                             | PCC           | FFP | Relative (95% CI) | Absolute (95% CI)                                  |                  |            |
| Extended Glasgow Outcome Scale at day 90 |                   |              |               |              |             |                                                  |               |     |                   |                                                    |                  |            |
| 1                                        | randomised trials | not serious  | not serious   | not serious  | not serious | publication bias strongly suspected <sup>a</sup> | 27            | 23  | -                 | MD 0.42<br>Score lower (1.66 lower to 0.82 higher) | ⊕⊕⊕○<br>MODERATE | IMPORTANT  |

CI: Confidence interval; OR: Odds ratio; MD: Mean difference; RR: Risk ratio

## Explanations

- a. Three studies to support this outcome
- b. Single study to support this outcome

Summary of findings:

**PCC compared to FFP for ICH occurring during use of VKA**

**Patient or population:** ICH occurring during use of VKA

**Setting:**

**Intervention:** PCC

**Comparison:** FFP

| Outcomes                           | Anticipated absolute effects* (95% CI)                         |                                                                                                                     | Relative effect (95% CI)           | № of participants (studies)       | Certainty of the evidence (GRADE) | Comments |
|------------------------------------|----------------------------------------------------------------|---------------------------------------------------------------------------------------------------------------------|------------------------------------|-----------------------------------|-----------------------------------|----------|
|                                    | Risk with FFP                                                  | Risk with PCC                                                                                                       |                                    |                                   |                                   |          |
| Mortality                          | 450 per 1,000                                                  | <b>361 per 1,000</b><br>(306 to 424)                                                                                | <b>OR 0.69</b><br>(0.54 to 0.90)   | 1012<br>(3 observational studies) | ⊕○○○<br>VERY LOW <sup>a</sup>     |          |
| Hematoma expansion, at 3 and 24 h  | The mean hematoma expansion, at 3 and 24 h was <b>0</b> mL     | The mean hematoma expansion, at 3 and 24 h in the intervention group was 13.89 mL lower (23.45 lower to 4.34 lower) | -                                  | 50<br>(1 RCT)                     | ⊕⊕⊕○<br>MODERATE <sup>b</sup>     |          |
| INR ≤ 1.2, at 3, 7 or 24 h         | 435 per 1,000                                                  | <b>897 per 1,000</b><br>(730 to 966)                                                                                | <b>OR 11.35</b><br>(3.52 to 36.55) | 46<br>(1 observational study)     | ⊕○○○<br>VERY LOW <sup>b</sup>     |          |
| mRS 0-3, 3 months                  | 391 per 1,000                                                  | <b>360 per 1,000</b><br>(113 to 1,000)                                                                              | <b>RR 0.92</b><br>(0.29 to 2.88)   | 50<br>(1 RCT)                     | ⊕⊕⊕○<br>MODERATE <sup>b</sup>     |          |
| NIHSS score at day 15 or discharge | The mean NIHSS score at day 15 or discharge was <b>0</b> Score | The mean NIHSS score at day 15 or discharge in the intervention group was 1.3 Score higher (5 lower to 7.6 higher)  | -                                  | 50<br>(1 RCT)                     | ⊕⊕⊕○<br>MODERATE <sup>b</sup>     |          |
| Barthel index at day 90            | The mean barthel index at day 90 was <b>0</b> Score            | The mean barthel index at day 90 in the intervention group was 17.5 Score higher (4.26 lower to 39.26 higher)       | -                                  | 50<br>(1 RCT)                     | ⊕⊕⊕○<br>MODERATE <sup>b</sup>     |          |

Summary of findings:

**PCC compared to FFP for ICH occurring during use of VKA**

**Patient or population:** ICH occurring during use of VKA

**Setting:**

**Intervention:** PCC

**Comparison:** FFP

| Outcomes                                 | Anticipated absolute effects* (95% CI)                        |                                                                                                                              | Relative effect (95% CI) | No of participants (studies) | Certainty of the evidence (GRADE) | Comments |
|------------------------------------------|---------------------------------------------------------------|------------------------------------------------------------------------------------------------------------------------------|--------------------------|------------------------------|-----------------------------------|----------|
|                                          | Risk with FFP                                                 | Risk with PCC                                                                                                                |                          |                              |                                   |          |
| Extended Glasgow Outcome Scale at day 90 | The mean extended Glasgow Outcome Scale at day 90 was 0 Score | The mean extended Glasgow Outcome Scale at day 90 in the intervention group was 0.42 Score lower (1.66 lower to 0.82 higher) | -                        | 50 (1 RCT)                   | ⊕⊕⊕○<br>MODERATE <sup>b</sup>     |          |

\*The risk in the intervention group (and its 95% confidence interval) is based on the assumed risk in the comparison group and the relative effect of the intervention (and its 95% CI).

CI: Confidence interval; OR: Odds ratio; MD: Mean difference; RR: Risk ratio

**GRADE Working Group grades of evidence**

**High certainty:** We are very confident that the true effect lies close to that of the estimate of the effect

**Moderate certainty:** We are moderately confident in the effect estimate: The true effect is likely to be close to the estimate of the effect, but there is a possibility that it is substantially different

**Low certainty:** Our confidence in the effect estimate is limited: The true effect may be substantially different from the estimate of the effect

**Very low certainty:** We have very little confidence in the effect estimate: The true effect is likely to be substantially different from the estimate of effect

**Explanations**

a. Three studies to support this outcome

b. Single study to support this outcome

Table: Effect of FFP compared to PCC on outcomes in patients with warfarin-associated intracranial hemorrhage

| Outcome                                          | Incidence (%) |           | n (N)   | OR [95% CI]            | I <sup>2</sup> | P value |
|--------------------------------------------------|---------------|-----------|---------|------------------------|----------------|---------|
|                                                  | PCC           | FFP       |         |                        |                |         |
| Mortality, PCC vs FFP                            | 36%           | 45%       | 2(1012) | 0.69 [0.54, 0.90]      | 0%             | 0.005   |
| Mortality, PCC vs FFP+PCC                        | 37%           | 27%       | 1(716)  | 1.57 [1.03, 2.38]      | NA             | 0.04    |
| Incidence of hematoma expansion                  | 22%           | 37%       | 1(99)   | 0.51 [0.21, 1.25]      | 0%             | 0.14    |
| Incidence of hematoma expansion leading to death | 4%            | 26%       | 1(50)   | 0.11 [0.01, 0.99]      | NA             | 0.05    |
| Extent of hematoma expansion, 3 h                | 9.7±20.9      | 23.7±28.4 | 1(50)   | -14.00 [-28.03, 0.03]  | NA             | 0.05    |
| Extent of hematoma expansion, 24 h               | 8.3±18.3      | 22.1±27.1 | 1(50)   | -13.80 [-26.85, -0.75] | NA             | 0.04    |
| Hematoma expansion ≥15% at 3 h                   | 58%           | 73%       | 1(48)   | 0.51 [0.15, 1.73]      | NA             | 0.28    |
| Hematoma expansion ≥33% at 3 h                   | 44%           | 59%       | 1(49)   | 0.55 [0.18, 1.73]      | NA             | 0.31    |
| Hematoma expansion ≥15% at 24 h                  | 44%           | 70%       | 1(47)   | 0.34 [0.10, 1.16]      | NA             | 0.09    |
| Hematoma expansion ≥33% at 24 h                  | 38%           | 58%       | 1(96)   | 0.44 [0.19, 1.02]      | NA             | 0.05    |
| INR ≤1.2 at 3 h                                  | 67%           | 9%        | 1(50)   | 21.00 [4.01, 110.06]   | NA             | 0.0003  |
| INR ≤1.2 at 7 h                                  | 86%           | 55%       | 1(50)   | 4.88 [1.17, 20.26]     | NA             | 0.03    |
| INR ≤1.2 at 24 h                                 | 100%          | 57%       | 1(44)   | 35.72 [1.92, 665.89]   | NA             | 0.02    |
| mRS 0-3 at 15 days                               | 26%           | 30%       | 1(50)   | 0.80 [0.23, 2.76]      | NA             | 0.72    |
| mRS 0-3 at 3 months                              | 29%           | 32%       | 1(99)   | 0.96 [0.39, 2.32]      | NA             | 0.92    |
| Adverse effects                                  |               |           |         |                        |                |         |
| At least one SAE                                 | 59%           | 43%       | 1(50)   | 1.89 [0.61, 5.83]      | NA             | 0.27    |
| Thromboembolic events                            | 26%           | 9%        | 1(50)   | 3.67 [0.68, 19.85]     | NA             | 0.13    |
| -MI                                              | 0%            | 0%        | 1(50)   | Not estimable          | NA             | NA      |
| -Ischemic stroke                                 | 7%            | 9%        | 1(50)   | 0.84 [0.11, 6.49]      | NA             | 0.87    |
| -Pulmonary embolism                              | 15%           | 0%        | 1(50)   | 9.00 [0.46, 176.69]    | NA             | 0.15    |
| -Deep vein thrombosis                            | 4%            | 0%        | 1(50)   | 2.66 [0.10, 68.50]     | NA             | 0.55    |
| NIHSS score at day 15                            | 12.2±11.1     | 10.9±11.5 | 1(50)   | 1.30 [-4.99, 7.59]     | NA             | 0.69    |
| Barthel index at day 90                          | 70.0±37.7     | 52.5±40.3 | 1(50)   | 17.50 [-4.26, 39.26]   | NA             | 0.11    |
| Extended Glasgow Outcome Scale at day 90         | 4.18±2.23     | 4.6±2.23  | 1(50)   | -0.42 [-1.66, 0.82]    | NA             | 0.51    |

FFP: Fresh frozen plasma; I<sup>2</sup>: Heterogeneity; n: Number of studies; N: Number of patients; p: Statistical significance value; PCC: Prothrombin complex concentrate; OR: Odds Ratio

Figure: Effect of PCC vs FFP on all-cause mortality in patients with warfarin-associated intracranial hemorrhage

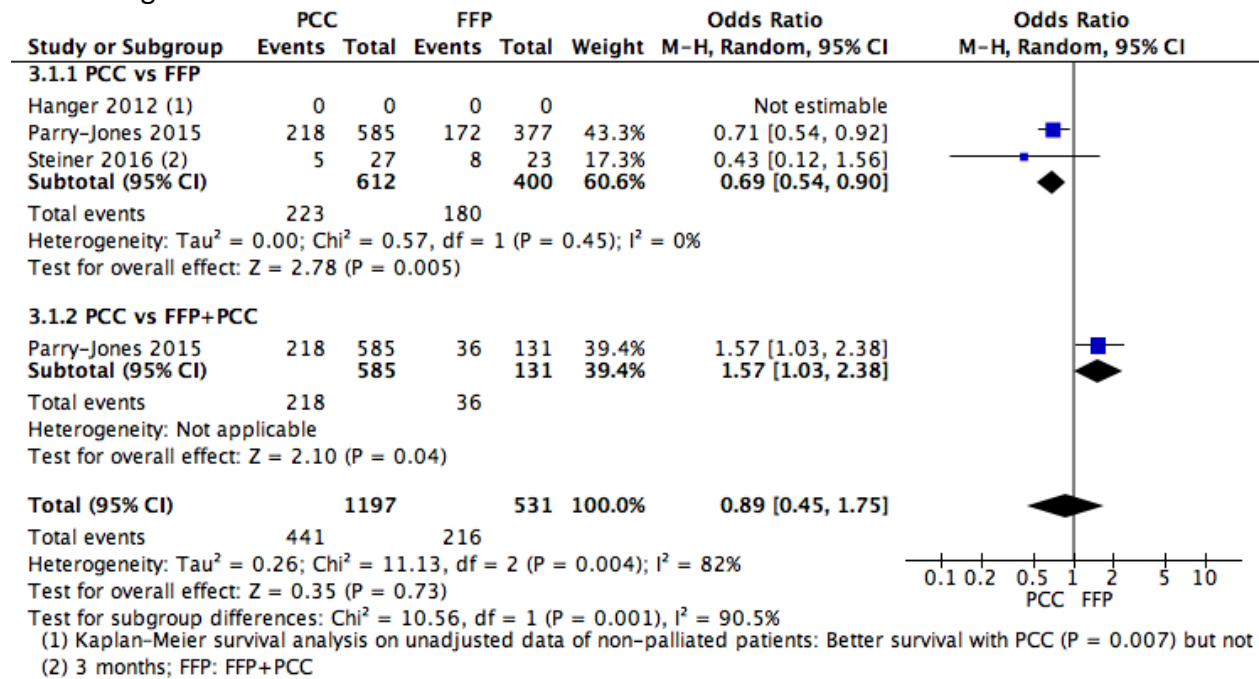

Figure: Effect of PCC vs FFP on incidence of hematoma expansion in patients with warfarin-associated intracranial hemorrhage

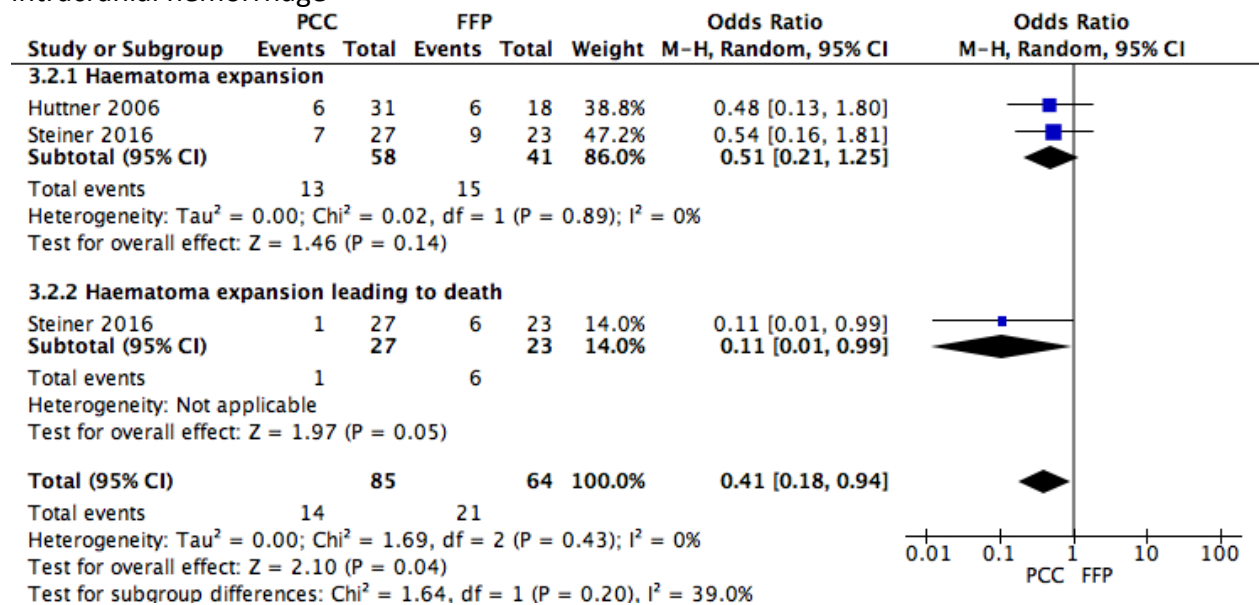

Figure: Effect of PCC vs FFP on extent of hematoma expansion (mL) in patients with warfarin-associated intracranial hemorrhage

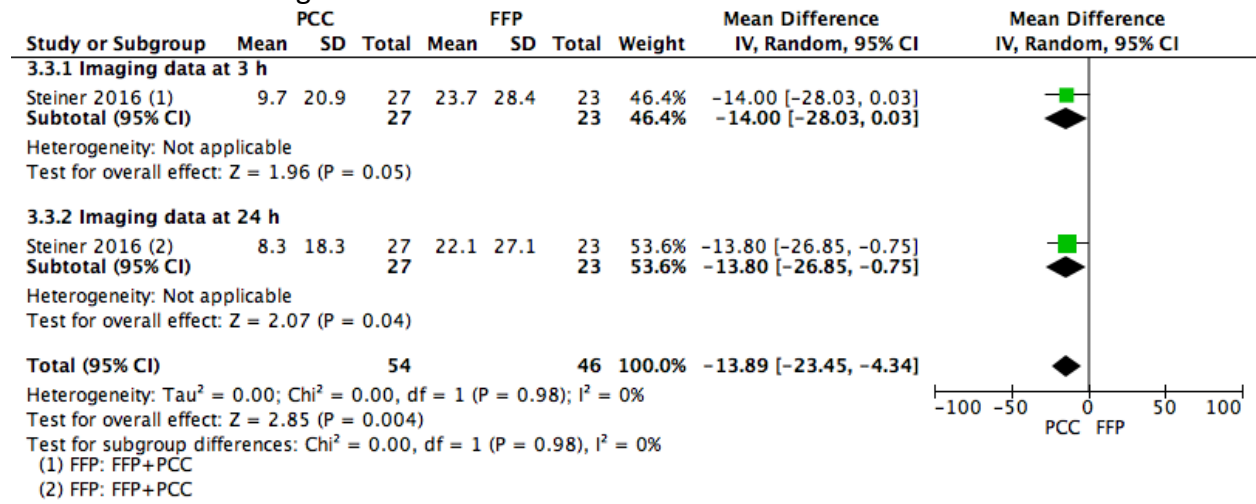



Figure: Effect of PCC vs FFP on % of hematoma expansion in patients with warfarin-associated intracranial hemorrhage

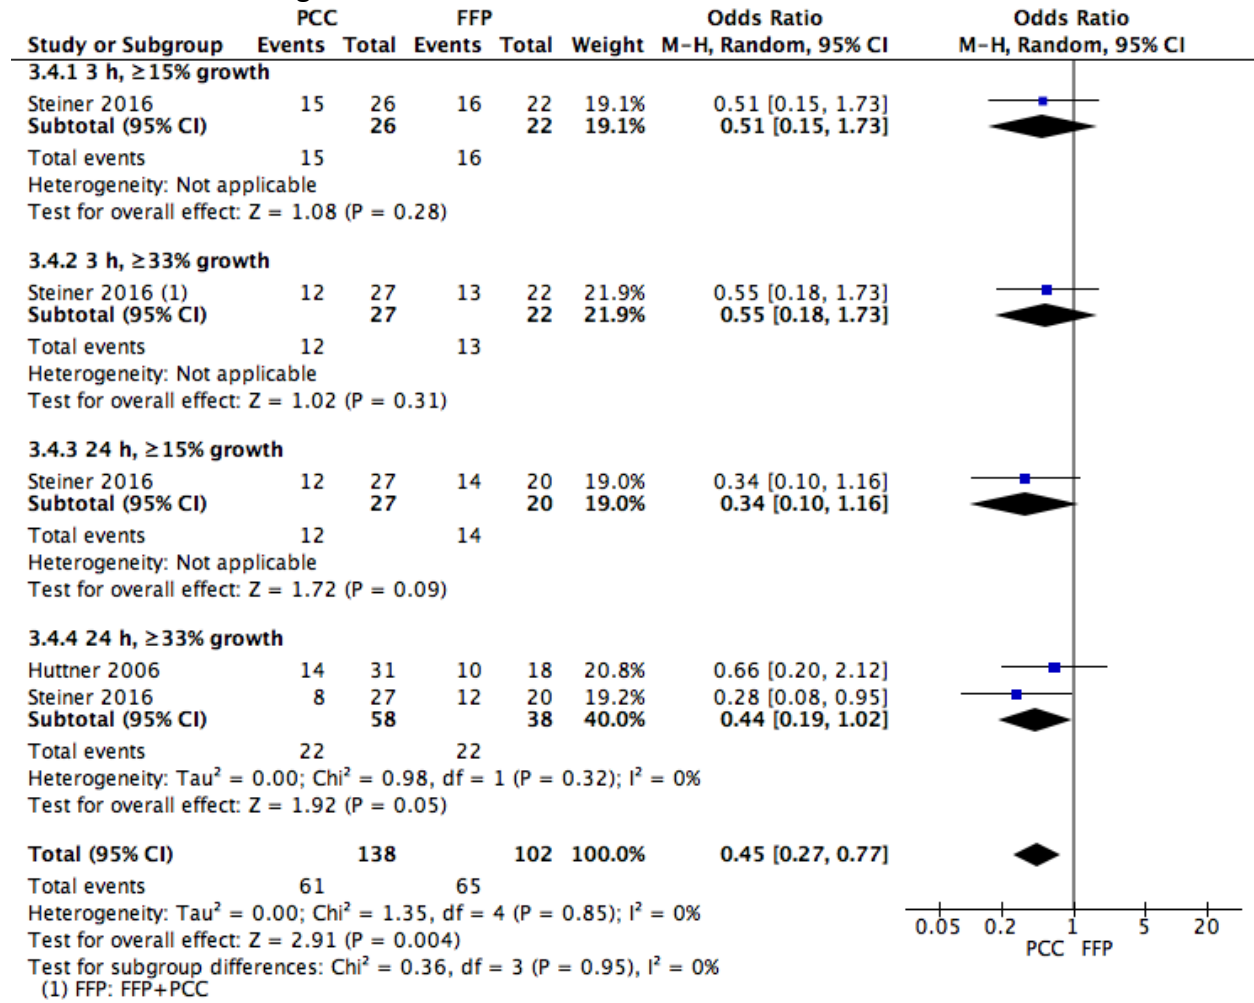

Figure: Effect of PCC vs FFP on INR  $\leq 1.2$  in patients with warfarin-associated intracranial hemorrhage

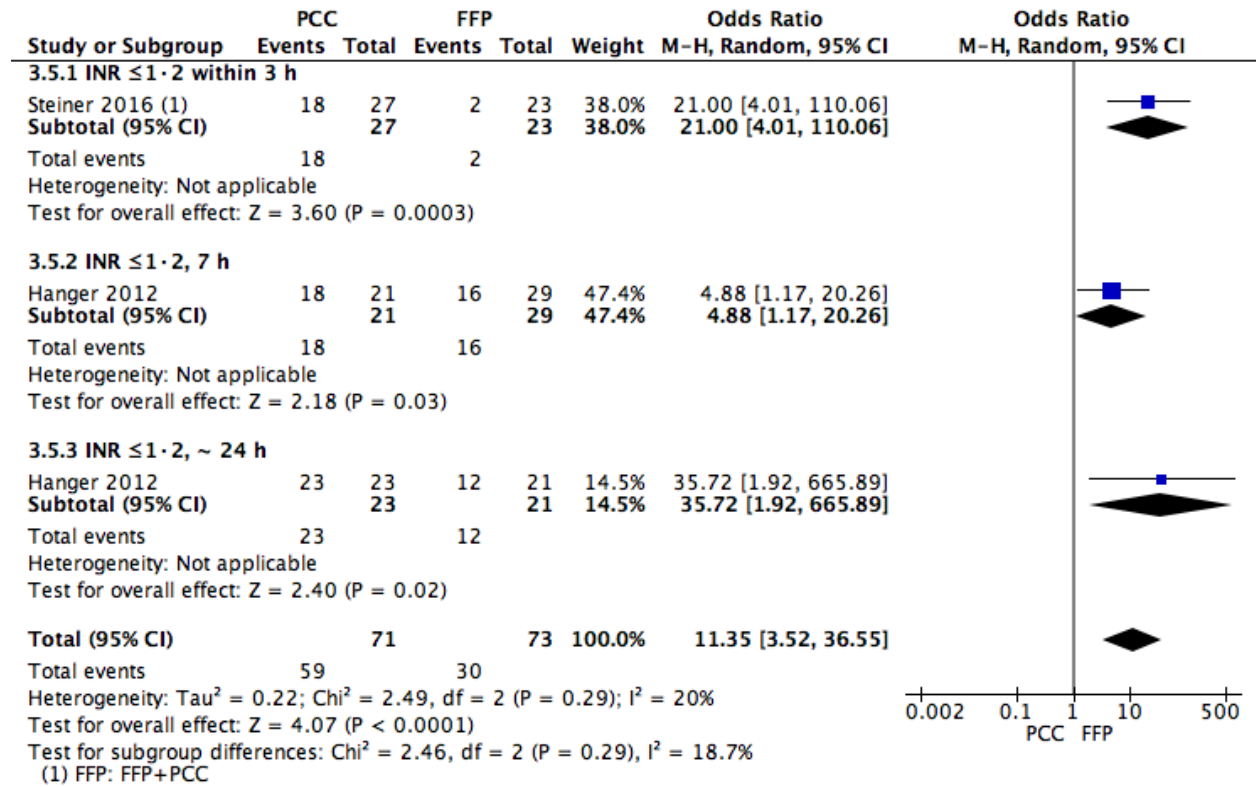

Figure: Effect of PCC vs FFP on mRS score 0-3 in patients with warfarin-associated intracranial hemorrhage

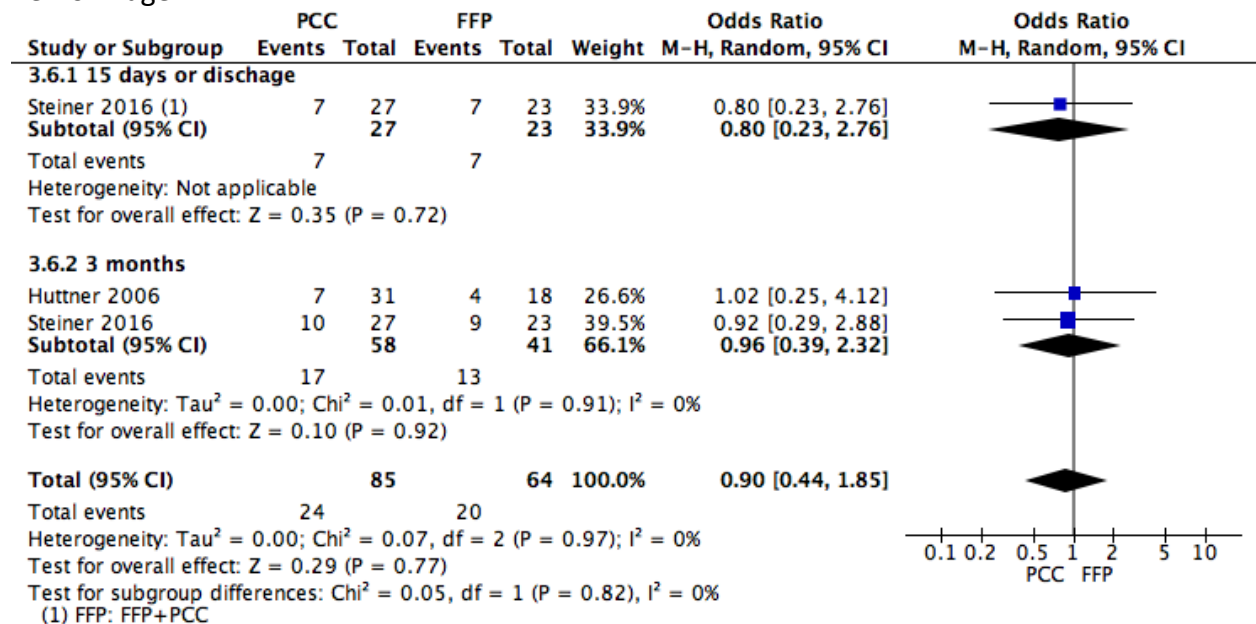

Figure: Effect of PCC vs FFP on adverse events in patients with warfarin-associated intracranial hemorrhage

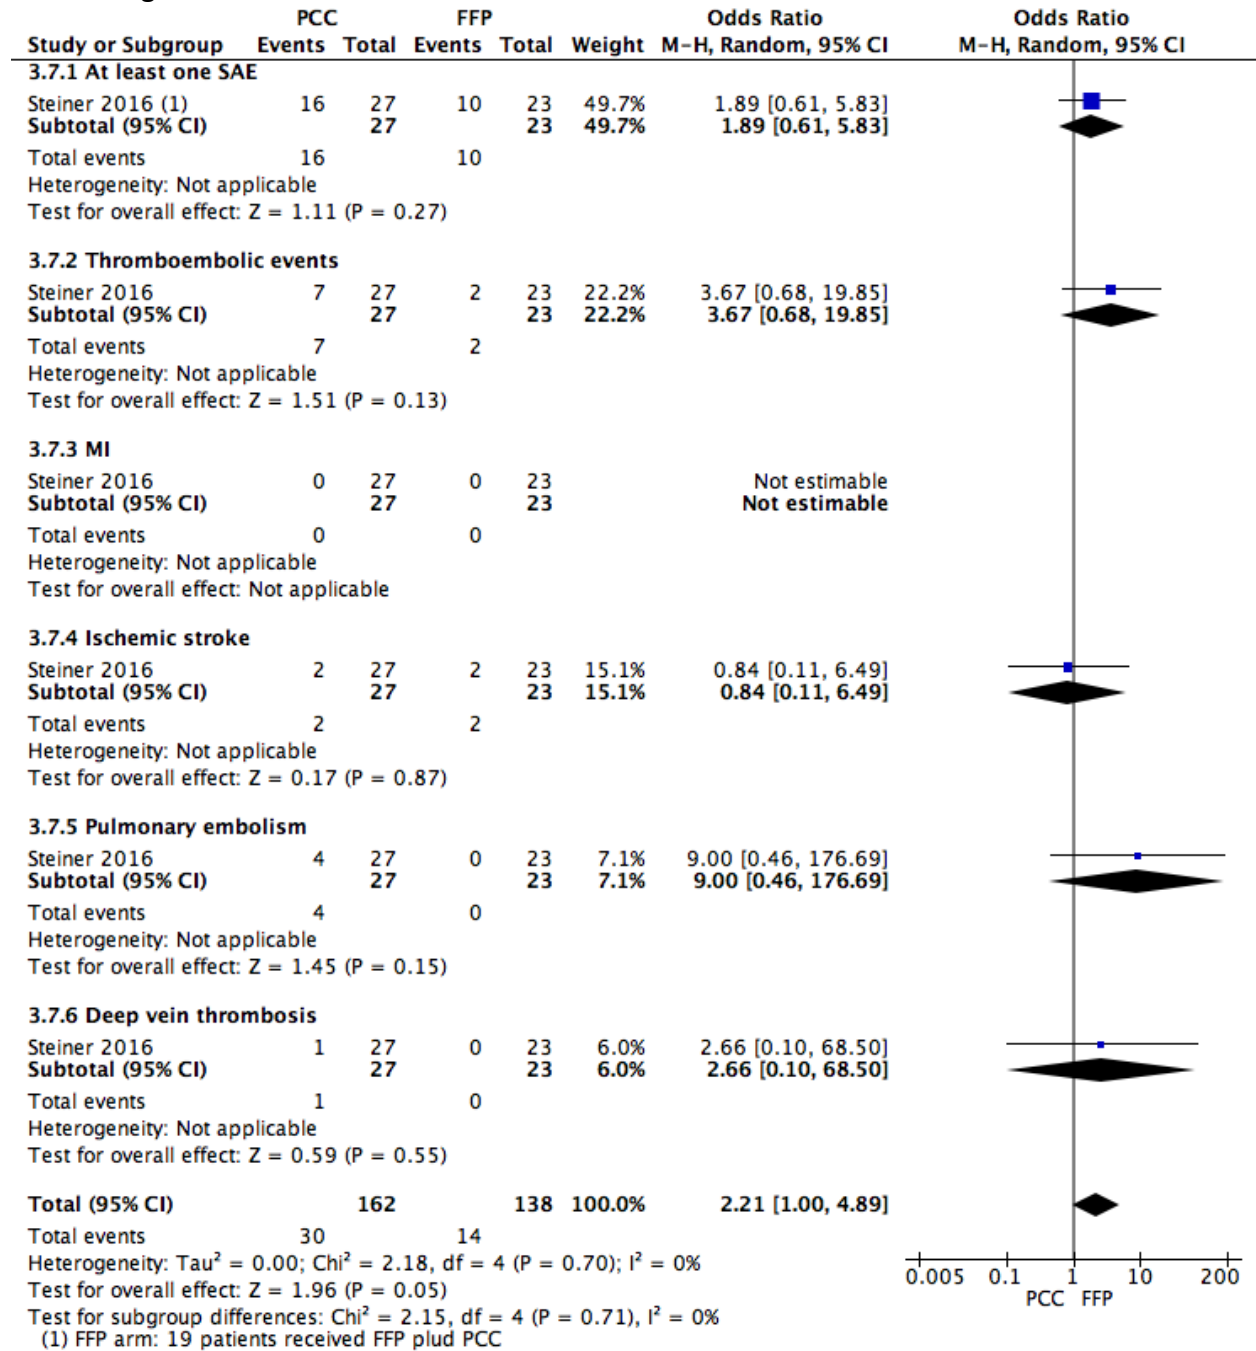

Figure: Effect of PCC vs FFP on NIHSS score at day 15 or discharge in patients with warfarin-associated intracranial hemorrhage

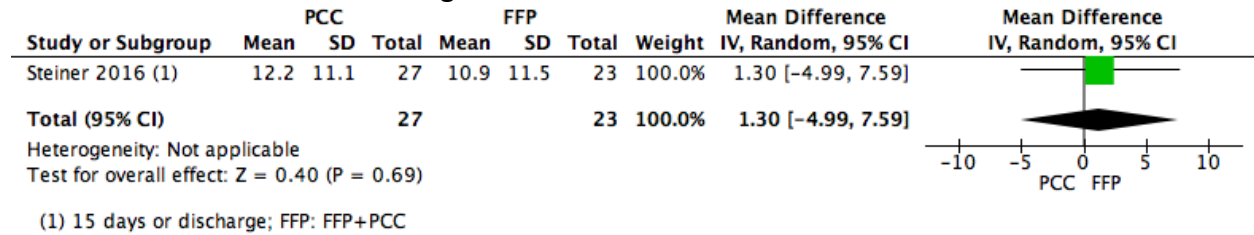

Figure: Effect of PCC vs FFP on Barthel index at day 90 in patients with warfarin-associated intracranial hemorrhage

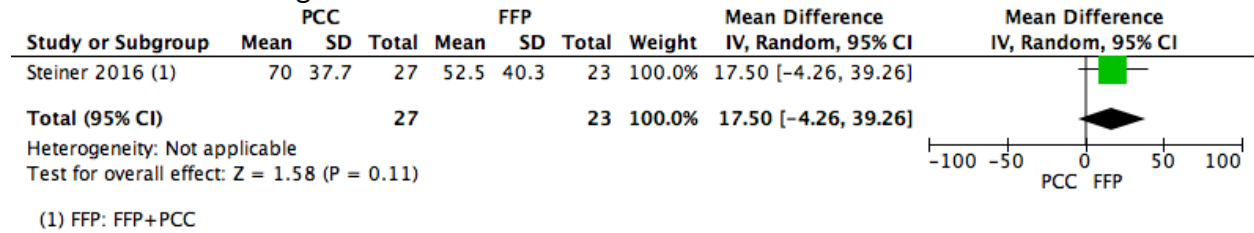

Figure: Effect of PCC vs FFP on Extended Glasgow Outcome Scale at day 90 in patients with warfarin-associated intracranial hemorrhage

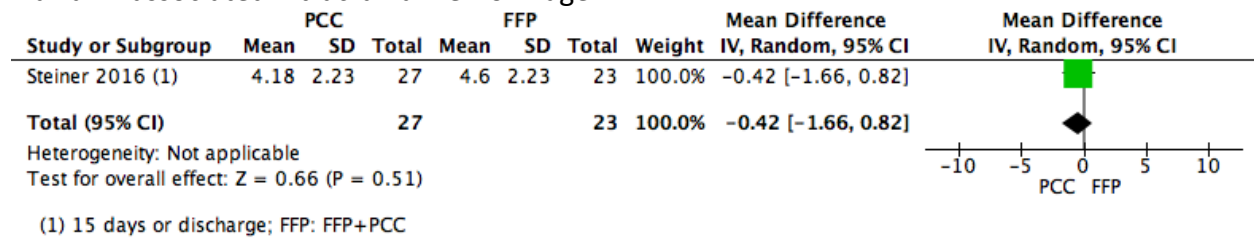

**PICO 6: In adult patients with ICH occurring during use of VKA (with an INR above normal) does use of Vit K in comparison to FFP improve outcomes**

Author(s):

Date:

Question: Vit K compared to FFP for ICH occurring during use of VKA

Setting:

Bibliography:

| Certainty assessment              |                       |              |               |              |                      |                                                                     | № of patients                                                                                                                          |               | Effect                  |                                                  | Certainty             | Importance |
|-----------------------------------|-----------------------|--------------|---------------|--------------|----------------------|---------------------------------------------------------------------|----------------------------------------------------------------------------------------------------------------------------------------|---------------|-------------------------|--------------------------------------------------|-----------------------|------------|
| № of studies                      | Study design          | Risk of bias | Inconsistency | Indirectness | Imprecision          | Other considerations                                                | Vit K                                                                                                                                  | FFP           | Relative (95% CI)       | Absolute (95% CI)                                |                       |            |
| Mortality                         |                       |              |               |              |                      |                                                                     |                                                                                                                                        |               |                         |                                                  |                       |            |
| 1                                 | observational studies | not serious  | not serious   | not serious  | not serious          | publication bias strongly suspected <sup>a</sup>                    | Kaplan–Meier survival analysis on unadjusted data, non-palliated patients: No significant difference in survival between Vit K or FFP. |               |                         |                                                  | ⊕○○○<br>○<br>VERY LOW | CRITICAL   |
| Incidence of hematoma enlargement |                       |              |               |              |                      |                                                                     |                                                                                                                                        |               |                         |                                                  |                       |            |
| 1                                 | observational studies | not serious  | not serious   | not serious  | serious <sup>b</sup> | publication bias strongly suspected strong association <sup>a</sup> | 3/6 (50.0%)                                                                                                                            | 6/18 (33.3%)  | OR 2.00 (0.31 to 13.06) | 167 more per 1,000 (from 199 fewer to 534 more)  | ⊕○○○<br>○<br>VERY LOW | IMPORTANT  |
| Extent of hematoma enlargement    |                       |              |               |              |                      |                                                                     |                                                                                                                                        |               |                         |                                                  |                       |            |
| 1                                 | observational studies | not serious  | not serious   | not serious  | serious <sup>b</sup> | publication bias strongly suspected <sup>a</sup>                    | 4/6 (66.7%)                                                                                                                            | 10/18 (55.6%) | OR 1.60 (0.23 to 11.08) | 111 more per 1,000 (from 332 fewer to 377 more)  | ⊕○○○<br>○<br>VERY LOW | IMPORTANT  |
| INR < or = 1.4                    |                       |              |               |              |                      |                                                                     |                                                                                                                                        |               |                         |                                                  |                       |            |
| 1                                 | observational studies | not serious  | not serious   | not serious  | serious <sup>b</sup> | publication bias strongly suspected <sup>a</sup>                    | 0/6 (0.0%)                                                                                                                             | 7/18 (38.9%)  | OR 0.12 (0.01 to 2.42)  | 318 fewer per 1,000 (from 217 more to 383 fewer) | ⊕○○○<br>○<br>VERY LOW | IMPORTANT  |
| mRS 0-3                           |                       |              |               |              |                      |                                                                     |                                                                                                                                        |               |                         |                                                  |                       |            |
| 1                                 | observational studies | not serious  | not serious   | not serious  | serious <sup>b</sup> | publication bias strongly suspected <sup>a</sup>                    | 1/6 (16.7%)                                                                                                                            | 4/18 (22.2%)  | OR 0.70 (0.06 to 7.85)  | 56 fewer per 1,000 (from 205 fewer to 469 more)  | ⊕○○○<br>○<br>VERY LOW | IMPORTANT  |

CI: Confidence interval; OR: Odds ratio

**Explanations**

a. Single study to support this outcome

b. Wide confidence interval

Summary of findings:

**Vit K compared to FFP for ICH occurring during use of VKA**

**Patient or population:** ICH occurring during use of VKA

**Setting:**

**Intervention:** Vit K

**Comparison:** FFP

| Outcomes                          | Anticipated absolute effects* (95% CI)                                                                                                 |                                      | Relative effect (95% CI)          | No of participants (studies)  | Certainty of the evidence (GRADE) | Comments |
|-----------------------------------|----------------------------------------------------------------------------------------------------------------------------------------|--------------------------------------|-----------------------------------|-------------------------------|-----------------------------------|----------|
|                                   | Risk with FFP                                                                                                                          | Risk with Vit K                      |                                   |                               |                                   |          |
| Mortality                         | Kaplan–Meier survival analysis on unadjusted data, non-palliated patients: No significant difference in survival between Vit K or FFP. |                                      |                                   | (1 observational study)       | ⊕○○○<br>VERY LOW <sup>a</sup>     |          |
| Incidence of hematoma enlargement | 333 per 1,000                                                                                                                          | <b>500 per 1,000</b><br>(134 to 867) | <b>OR 2.00</b><br>(0.31 to 13.06) | 24<br>(1 observational study) | ⊕○○○<br>VERY LOW <sup>a,b</sup>   |          |
| Extent of hematoma enlargement    | 556 per 1,000                                                                                                                          | <b>667 per 1,000</b><br>(223 to 933) | <b>OR 1.60</b><br>(0.23 to 11.08) | 24<br>(1 observational study) | ⊕○○○<br>VERY LOW <sup>a,b</sup>   |          |
| INR < or = 1.4                    | 389 per 1,000                                                                                                                          | <b>71 per 1,000</b><br>(6 to 606)    | <b>OR 0.12</b><br>(0.01 to 2.42)  | 24<br>(1 observational study) | ⊕○○○<br>VERY LOW <sup>a,b</sup>   |          |
| mRS 0-3                           | 222 per 1,000                                                                                                                          | <b>167 per 1,000</b><br>(17 to 692)  | <b>OR 0.70</b><br>(0.06 to 7.85)  | 24<br>(1 observational study) | ⊕○○○<br>VERY LOW <sup>a,b</sup>   |          |

\*The risk in the intervention group (and its 95% confidence interval) is based on the assumed risk in the comparison group and the **relative effect** of the intervention (and its 95% CI).

CI: Confidence interval; OR: Odds ratio

**GRADE Working Group grades of evidence**

**High certainty:** We are very confident that the true effect lies close to that of the estimate of the effect

**Moderate certainty:** We are moderately confident in the effect estimate: The true effect is likely to be close to the estimate of the effect, but there is a possibility that it is substantially different

**Low certainty:** Our confidence in the effect estimate is limited: The true effect may be substantially different from the estimate of the effect

**Very low certainty:** We have very little confidence in the effect estimate: The true effect is likely to be substantially different from the estimate of effect

**Explanations**

a. Single study to support this outcome

b. Wide confidence interval

Table: Effect of Vit K compared to FFP on outcomes in patients with warfarin-associated intracranial hemorrhage

| Outcome                         | Incidence (%)                                                                                                                                        |     | n (N) | OR [95% CI]        | I <sup>2</sup> | P value |
|---------------------------------|------------------------------------------------------------------------------------------------------------------------------------------------------|-----|-------|--------------------|----------------|---------|
|                                 | Vit K                                                                                                                                                | FFP |       |                    |                |         |
| Mortality, Vit K vs FFP         | Kaplan–Meier survival analysis on unadjusted data, non-palliated patients: No significant difference in survival between Vit K and FFP (Hanger 2012) |     |       |                    |                |         |
| Incidence of hematoma expansion | 50%                                                                                                                                                  | 33% | 1(24) | 2.00 [0.31, 13.06] | NA             | 0.47    |
| Hematoma expansion >33%         | 67%                                                                                                                                                  | 56% | 1(24) | 1.60 [0.23, 11.08] | NA             | 0.63    |
| INR ≤1.4                        | 0%                                                                                                                                                   | 39% | 1(24) | 0.12 [0.01, 2.42]  | NA             | 0.17    |
| mRS 0-3                         | 17%                                                                                                                                                  | 22% | 1(24) | 0.70 [0.06, 7.85]  | NA             | 0.77    |

FFP: Fresh frozen plasma; I<sup>2</sup>: Heterogeneity; n: Number of studies; N: Number of patients; p: Statistical significance value; OR: Odds Ratio

Figure: Effect of Vit K vs FFP on incidence of hematoma enlargement in patients with warfarin-associated intracranial hemorrhage

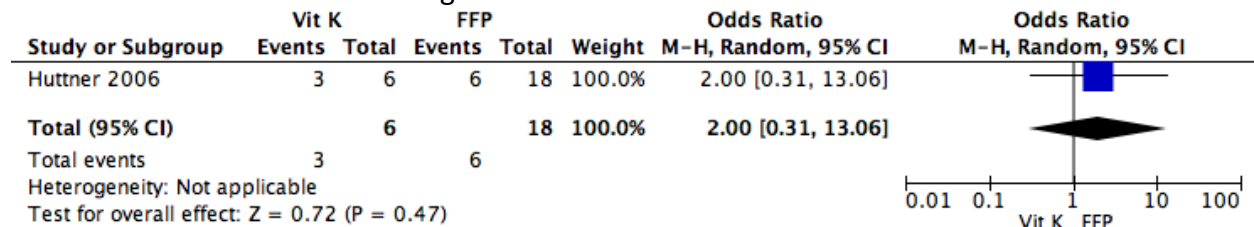

Figure: Effect of Vit K vs FFP on extent of hematoma enlargement > 33% in patients with warfarin-associated intracranial hemorrhage

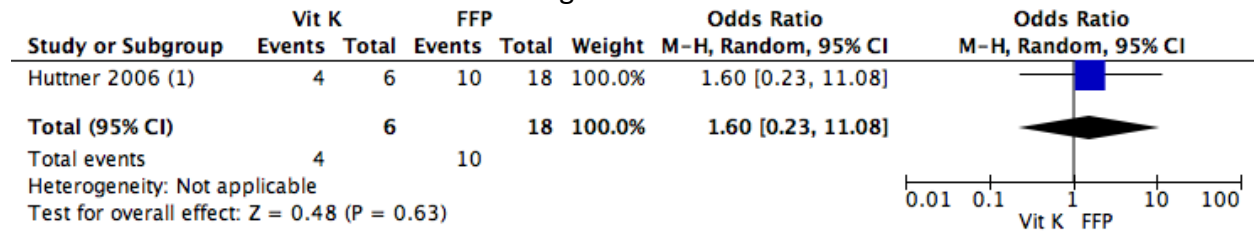

(1) PCC alone or with FFP or Vit K

Figure: Effect of Vit K vs FFP on INR  $\leq 1.4$  in patients with warfarin-associated intracranial hemorrhage

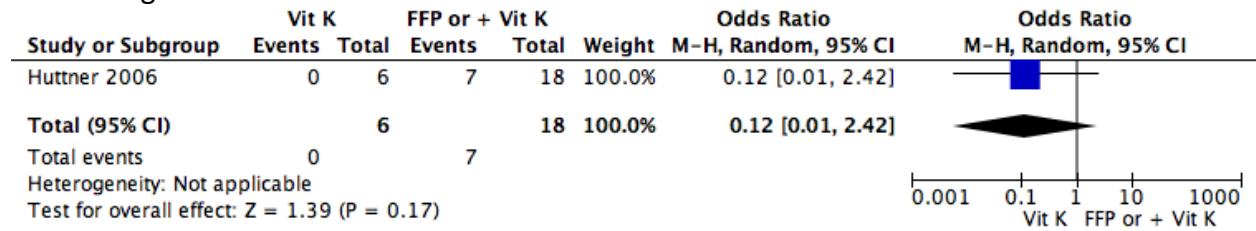

Figure: Effect of Vit K vs FFP on mRS 0-3 in patients with warfarin-associated intracranial hemorrhage

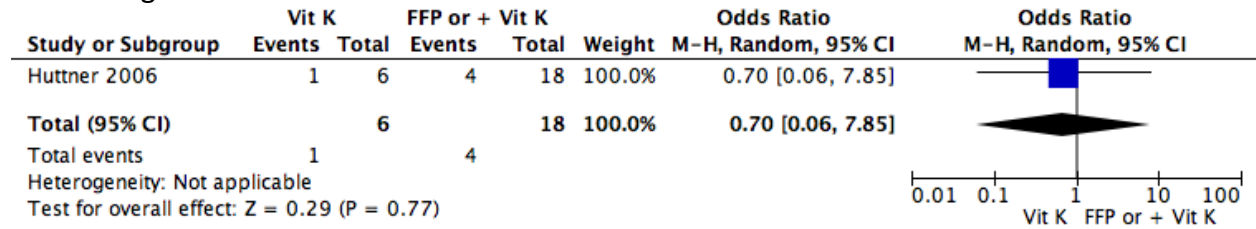



**PICO 7: In adult patients with ICH occurring during use of VKA (with an INR above normal) does use of Vit K in comparison to PCC improve outcomes**

Author(s):

Date:

Question: Vit K compared to PCC for ICH occurring during use of VKA

Setting:

Bibliography:

| Certainty assessment                 |                       |              |               |              |                      |                                                                     | № of patients |               | Effect                  |                                                 | Certainty                                                                             | Importance |
|--------------------------------------|-----------------------|--------------|---------------|--------------|----------------------|---------------------------------------------------------------------|---------------|---------------|-------------------------|-------------------------------------------------|---------------------------------------------------------------------------------------|------------|
| № of studies                         | Study design          | Risk of bias | Inconsistency | Indirectness | Imprecision          | Other considerations                                                | Vit K         | PCC           | Relative (95% CI)       | Absolute (95% CI)                               |                                                                                       |            |
| Mortality                            |                       |              |               |              |                      |                                                                     |               |               |                         |                                                 |                                                                                       |            |
| 2                                    | observational studies | not serious  | not serious   | not serious  | serious <sup>a</sup> | publication bias strongly suspected <sup>b</sup>                    | 1/4 (25.0%)   | 1/11 (9.1%)   | OR 3.33 (0.16 to 70.91) | 159 more per 1,000 (from 75 fewer to 785 more)  | 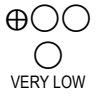   | CRITICAL   |
| Incidence of hematoma enlargement    |                       |              |               |              |                      |                                                                     |               |               |                         |                                                 |                                                                                       |            |
| 2                                    | observational studies | not serious  | not serious   | not serious  | serious <sup>a</sup> | publication bias strongly suspected strong association <sup>b</sup> | 3/10 (30.0%)  | 7/42 (16.7%)  | OR 2.85 (0.57 to 14.27) | 196 more per 1,000 (from 64 fewer to 574 more)  |    | IMPORTANT  |
| Extent of hematoma enlargement < 33% |                       |              |               |              |                      |                                                                     |               |               |                         |                                                 |                                                                                       |            |
| 1                                    | observational studies | not serious  | not serious   | not serious  | serious <sup>a</sup> | publication bias strongly suspected <sup>c</sup>                    | 4/6 (66.7%)   | 14/31 (45.2%) | OR 2.43 (0.39 to 15.27) | 215 more per 1,000 (from 209 fewer to 475 more) |  | IMPORTANT  |
| INR = or < 1.4                       |                       |              |               |              |                      |                                                                     |               |               |                         |                                                 |                                                                                       |            |
| 1                                    | observational studies | not serious  | not serious   | not serious  | not serious          | publication bias strongly suspected <sup>c</sup>                    | 0/6 (0.0%)    | 26/31 (83.9%) | OR 0.02 (0.00 to 0.33)  | 745 fewer per 1,000 (from -- to 207 fewer)      |  | IMPORTANT  |
| mRS                                  |                       |              |               |              |                      |                                                                     |               |               |                         |                                                 |                                                                                       |            |
| 1                                    | observational studies | not serious  | not serious   | not serious  | serious <sup>a</sup> | publication bias strongly suspected <sup>c</sup>                    | 1/6 (16.7%)   | 7/31 (22.6%)  | OR 0.69 (0.07 to 6.88)  | 58 fewer per 1,000 (from 206 fewer to 442 more) |  | IMPORTANT  |

CI: Confidence interval; OR: Odds ratio

**Explanations**

- a. Wide confidence interval
- b. Two studies to support this outcome
- c. One study to support this outcome

Summary of findings:

**Vit K compared to PCC for ICH occurring during use of VKA**

**Patient or population:** ICH occurring during use of VKA

**Setting:**

**Intervention:** Vit K

**Comparison:** PCC

| Outcomes                             | Anticipated absolute effects* (95% CI) |                                      | Relative effect (95% CI)          | № of participants (studies)     | Certainty of the evidence (GRADE) | Comments |
|--------------------------------------|----------------------------------------|--------------------------------------|-----------------------------------|---------------------------------|-----------------------------------|----------|
|                                      | Risk with PCC                          | Risk with Vit K                      |                                   |                                 |                                   |          |
| Mortality                            | 91 per 1,000                           | <b>250 per 1,000</b><br>(16 to 876)  | <b>OR 3.33</b><br>(0.16 to 70.91) | 15<br>(2 observational studies) | ⊕○○○<br>VERY LOW <sup>a,b</sup>   |          |
| Incidence of hematoma enlargement    | 167 per 1,000                          | <b>363 per 1,000</b><br>(102 to 741) | <b>OR 2.85</b><br>(0.57 to 14.27) | 52<br>(2 observational studies) | ⊕○○○<br>VERY LOW <sup>a,b</sup>   |          |
| Extent of hematoma enlargement < 33% | 452 per 1,000                          | <b>667 per 1,000</b><br>(243 to 926) | <b>OR 2.43</b><br>(0.39 to 15.27) | 37<br>(1 observational study)   | ⊕○○○<br>VERY LOW <sup>a,c</sup>   |          |
| INR = or < 1.4                       | 839 per 1,000                          | <b>94 per 1,000</b><br>(0 to 632)    | <b>OR 0.02</b><br>(0.00 to 0.33)  | 37<br>(1 observational study)   | ⊕○○○<br>VERY LOW <sup>c</sup>     |          |
| mRS                                  | 226 per 1,000                          | <b>168 per 1,000</b><br>(20 to 667)  | <b>OR 0.69</b><br>(0.07 to 6.88)  | 37<br>(1 observational study)   | ⊕○○○<br>VERY LOW <sup>a,c</sup>   |          |

\*The risk in the intervention group (and its 95% confidence interval) is based on the assumed risk in the comparison group and the relative effect of the intervention (and its 95% CI).

CI: Confidence interval; OR: Odds ratio

**GRADE Working Group grades of evidence**

**High certainty:** We are very confident that the true effect lies close to that of the estimate of the effect

**Moderate certainty:** We are moderately confident in the effect estimate: The true effect is likely to be close to the estimate of the effect, but there is a possibility that it is substantially different

**Low certainty:** Our confidence in the effect estimate is limited: The true effect may be substantially different from the estimate of the effect

**Very low certainty:** We have very little confidence in the effect estimate: The true effect is likely to be substantially different from the estimate of effect

**Explanations**

a. Wide confidence interval

b. Two studies to support this outcome

c. One study to support this outcome

Table: Effect of Vit K compared to PCC on outcomes in patients with warfarin-associated intracranial hemorrhage

| Outcome                                                     | Incidence (%)   |                 | n (N) | OR [95% CI]          | I <sup>2</sup> | P value  |
|-------------------------------------------------------------|-----------------|-----------------|-------|----------------------|----------------|----------|
|                                                             | Vit K           | PCC             |       |                      |                |          |
| Mortality, Vit K vs PCC+Vit K                               | 25%             | 9%              | 1(15) | 3.33 [0.16, 70.91]   | NA             | 0.44     |
| Mortality, Vit K vs PCC                                     | 25%             | 50%             | 1(6)  | 0.33 [0.01, 11.94]   | NA             | 0.55     |
| Incidence of hematoma expansion, Vit K vs PCC+Vit K         | 30%             | 17%             | 1(52) | 2.85 [0.57, 14.27]   | NA             | 0.20     |
| Incidence of hematoma expansion, Vit K vs PCC               | 0%              | 0%              | 1(6)  | Not estimable        | NA             | NA       |
| Extent of hematoma expansion $\geq$ 33%, Vit K vs PCC+Vit K | 67%             | 45%             | 1(37) | 2.43 [0.39, 15.27]   | NA             | 0.34     |
| INR $\leq$ 1.4, Baseline, Vit K+PCC vs PCC                  | 2.70 $\pm$ 2.44 | 6.23 $\pm$ 2.08 | 1(13) | -3.53 [-6.75, -0.31] | NA             | 0.03     |
| INR $\leq$ 1.4, 10 min, Vit K+PCC vs PCC                    | 1.13 $\pm$ 0.13 | 1.36 $\pm$ 0.15 | 1(13) | -0.23 [-0.45, -0.01] | NA             | 0.04     |
| INR $\leq$ 1.4, 12-24 h, Vit K+PCC vs PCC                   | 1.06 $\pm$ 0.09 | 2.07 $\pm$ 0.33 | 1(13) | -1.01 [-1.47, -0.55] | NA             | < 0.0001 |
| INR at Baseline, Vit K vs PCC                               | 2.69 $\pm$ 0.38 | 6.23 $\pm$ 2.08 | 1(6)  | -3.54 [-6.45, -0.63] | NA             | 0.02     |
| INR at 10 min, Vit K vs PCC                                 | 2.69 $\pm$ 0.38 | 1.36 $\pm$ 0.15 | 1(6)  | 1.33 [0.90, 1.76]    | NA             | <0.00001 |
| INR at 12-24 h Vit K vs PCC                                 | 1.28 $\pm$ 0.06 | 2.07 $\pm$ 0.33 | 1(6)  | -0.79 [-1.25, -0.33] | NA             | 0.0008   |
| INR $\leq$ 1.4                                              | 0%              | 84%             | 1(37) | 0.02 [0.00, 0.33]    | NA             | 0.007    |
| mRS 0-3                                                     | 17%             | 23%             | 1(37) | 0.69 [0.07, 6.88]    | NA             | 0.75     |

I<sup>2</sup>: Heterogeneity; n: Number of studies; N: Number of patients; p: Statistical significance value; PCC: Prothrombin complex concentrate; OR: Odds Ratio

Figure: Effect of Vit K vs PCC on mortality in patients with warfarin-associated intracranial hemorrhage

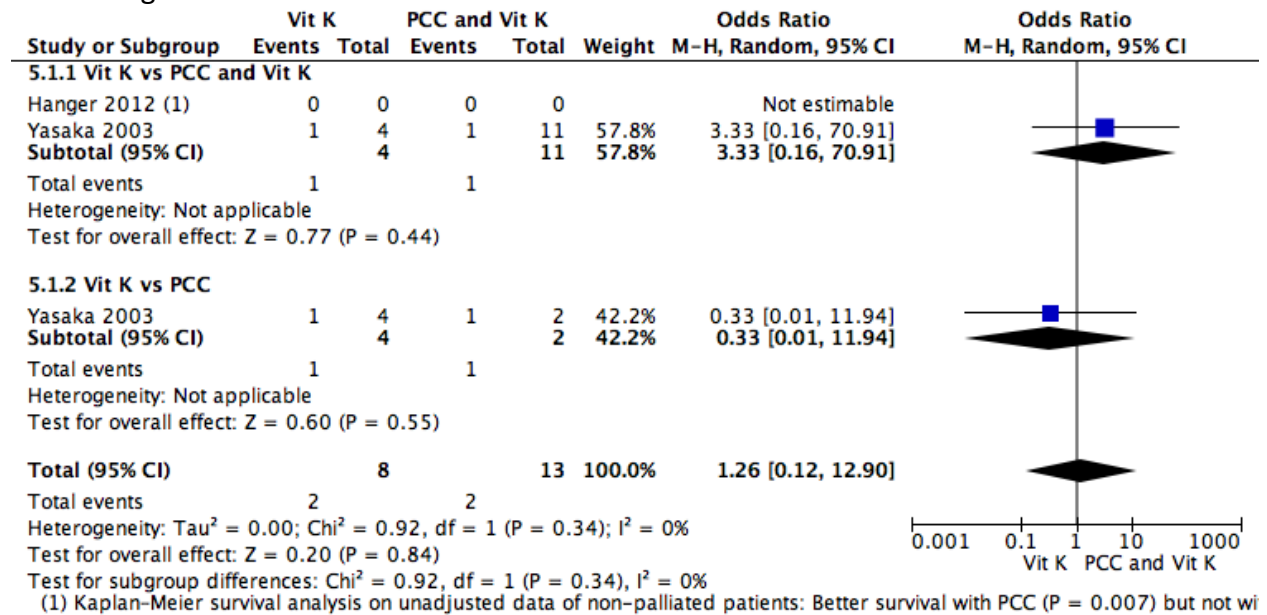

Figure: Effect of Vit K vs PCC on incidence of hematoma enlargement in patients with warfarin-associated intracranial hemorrhage

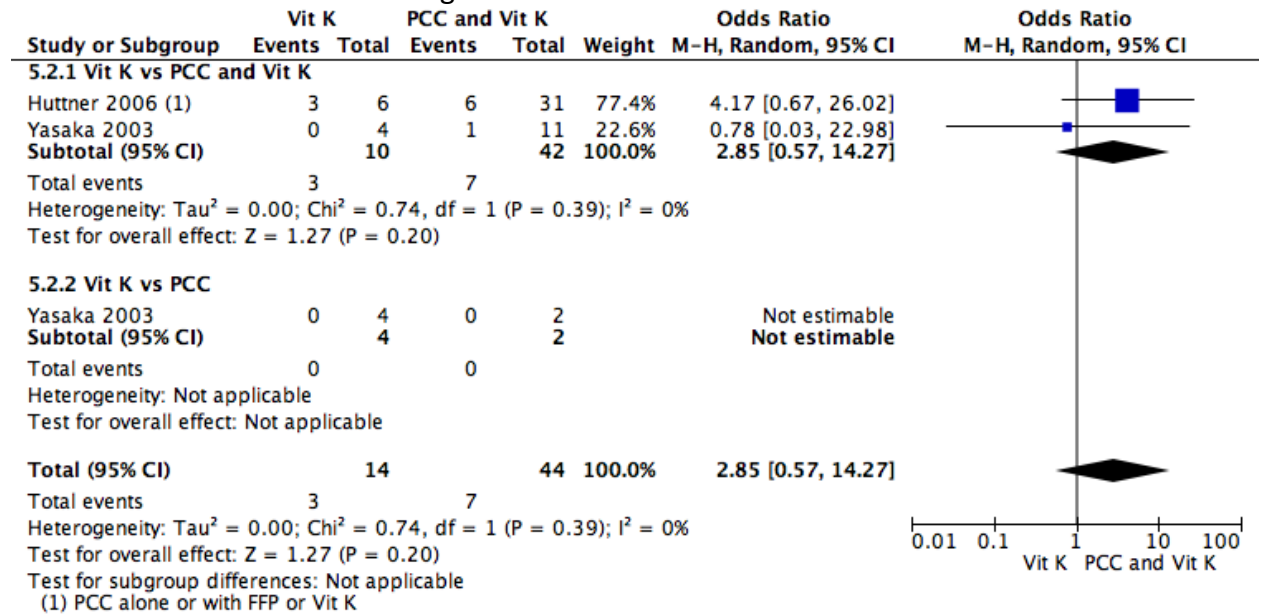

Figure: Effect of Vit K vs PCC on extent of hematoma enlargement > 33% in patients with warfarin-associated intracranial hemorrhage

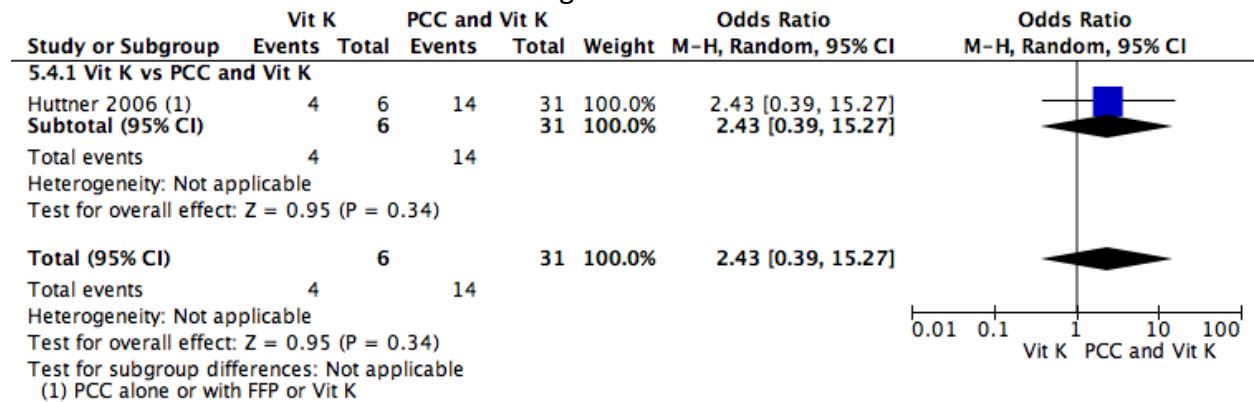

Figure: Effect of Vit K and PCC vs PCC on INR in patients with warfarin-associated intracranial hemorrhage

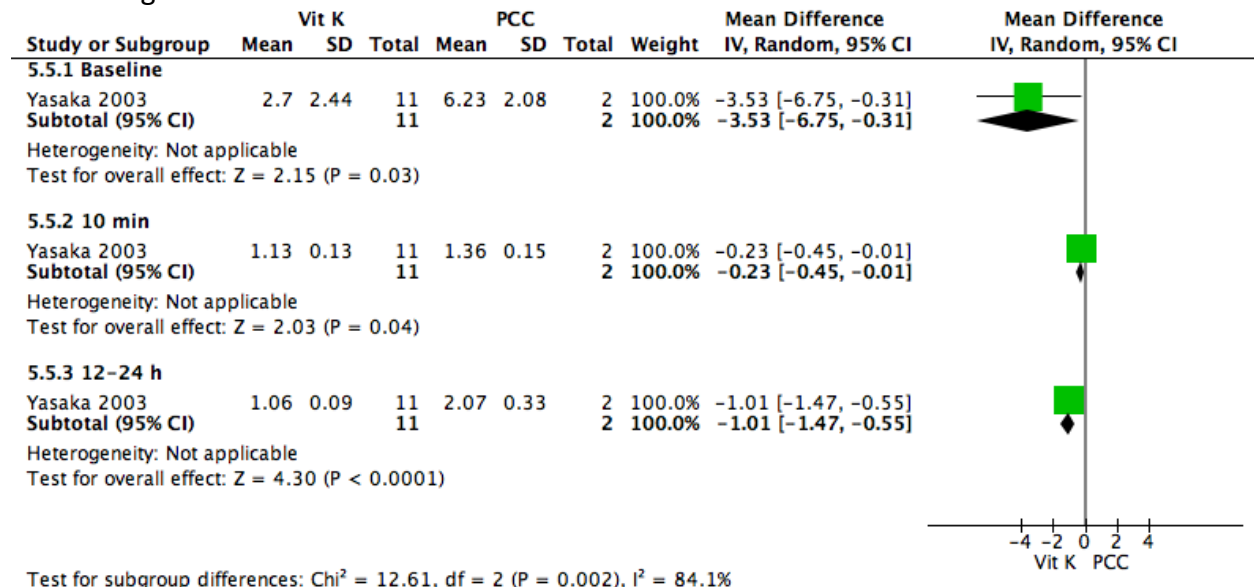

Figure: Effect of Vit K vs PCC on INR in patients with warfarin-associated intracranial hemorrhage

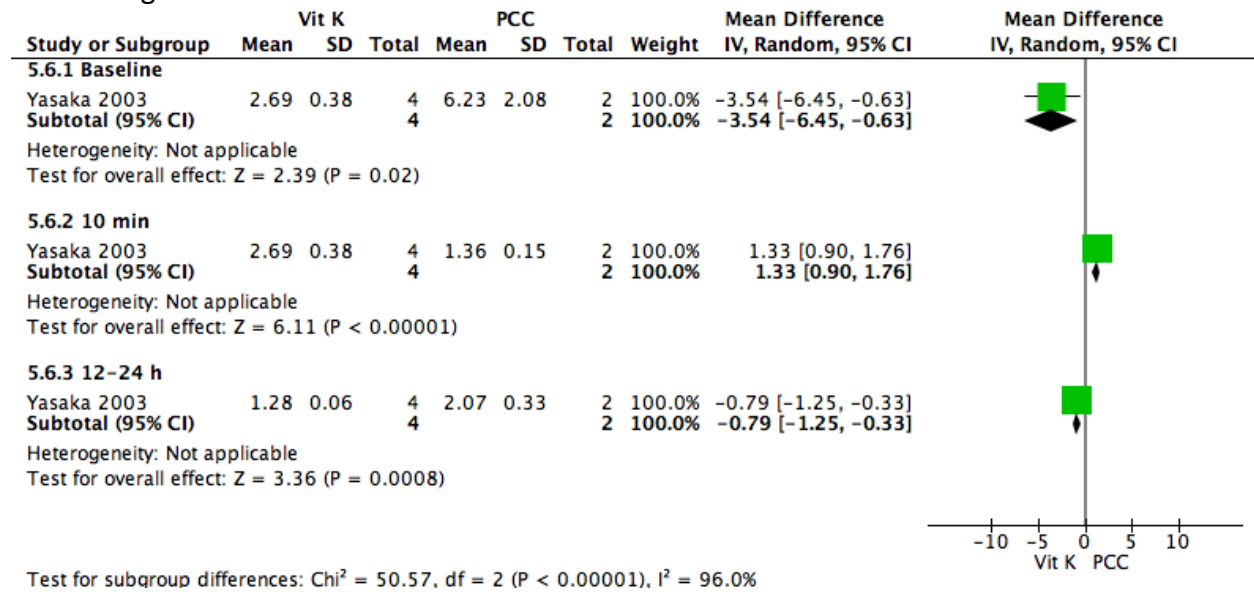

Figure: Effect of Vit K vs PCC on incidence of INR ≤1.4 in patients with warfarin-associated intracranial hemorrhage

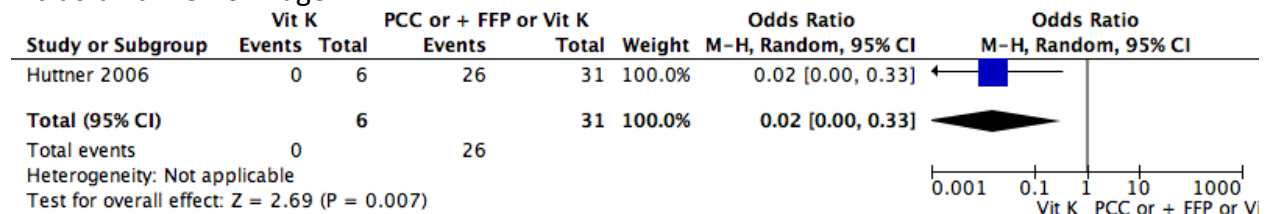

Figure: Effect of Vit K vs PCC on incidence of mRS 0-3 in patients with warfarin-associated intracranial hemorrhage

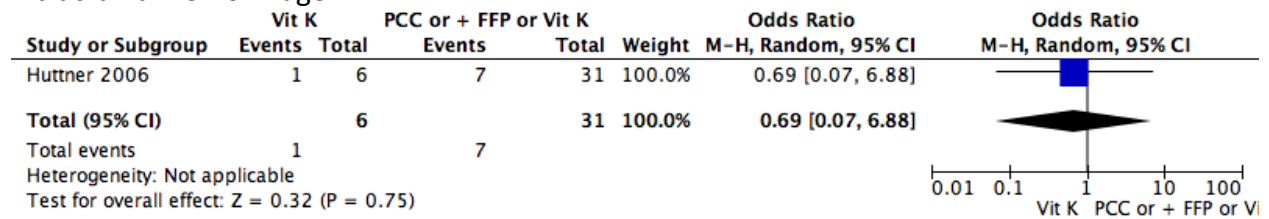

## PICO 9: In adult patients with ICH occurring during use of VKA (with an INR above normal) does use of rFVII in comparison to FFP improve outcomes

Author(s):

Date:

Question: rFVII compared to FFP and Vit K for ICH occurring during use of VKA

Setting:

Bibliography:

| Certainty assessment |                       |              |               |              |                      |                                                                     | № of patients |               | Effect                  |                                                | Certainty        | Importance |
|----------------------|-----------------------|--------------|---------------|--------------|----------------------|---------------------------------------------------------------------|---------------|---------------|-------------------------|------------------------------------------------|------------------|------------|
| № of studies         | Study design          | Risk of bias | Inconsistency | Indirectness | Imprecision          | Other considerations                                                | rFVII         | FFP and Vit K | Relative (95% CI)       | Absolute (95% CI)                              |                  |            |
| Mortality            |                       |              |               |              |                      |                                                                     |               |               |                         |                                                |                  |            |
| 1                    | observational studies | not serious  | not serious   | not serious  | not serious          | publication bias strongly suspected strong association <sup>a</sup> | 16/45 (35.6%) | 6/34 (17.6%)  | OR 2.57 (0.88 to 7.52)  | 179 more per 1,000 (from 18 fewer to 441 more) | ⊕⊕○○<br>LOW      | CRITICAL   |
| INR, 3 and 6 h       |                       |              |               |              |                      |                                                                     |               |               |                         |                                                |                  |            |
| 1                    | observational studies | not serious  | not serious   | not serious  | not serious          | publication bias strongly suspected <sup>a</sup>                    | 45            | 34            | -                       | MD 0.41 lower (0.55 lower to 0.27 lower)       | ⊕○○○<br>VERY LOW | IMPORTANT  |
| Stroke               |                       |              |               |              |                      |                                                                     |               |               |                         |                                                |                  |            |
| 1                    | observational studies | not serious  | not serious   | not serious  | serious <sup>b</sup> | publication bias strongly suspected strong association <sup>a</sup> | 1/45 (2.2%)   | 0/34 (0.0%)   | OR 2.33 (0.09 to 58.88) | 0 fewer per 1,000 (from 0 fewer to 0 fewer)    | ⊕○○○<br>VERY LOW | CRITICAL   |
| Thrombolism          |                       |              |               |              |                      |                                                                     |               |               |                         |                                                |                  |            |
| 1                    | observational studies | not serious  | not serious   | not serious  | serious <sup>b</sup> | publication bias strongly suspected strong association <sup>a</sup> | 1/45 (2.2%)   | 3/34 (8.8%)   | OR 0.23 (0.02 to 2.36)  | 66 fewer per 1,000 (from 86 fewer to 98 more)  | ⊕○○○<br>VERY LOW | CRITICAL   |
| Transfusion of FFP   |                       |              |               |              |                      |                                                                     |               |               |                         |                                                |                  |            |
| 1                    | observational studies | not serious  | not serious   | not serious  | not serious          | publication bias strongly suspected <sup>a</sup>                    | 45            | 34            | -                       | MD 2 Units lower (3.53 lower to 0.47 lower)    | ⊕○○○<br>VERY LOW | IMPORTANT  |

CI: Confidence interval; OR: Odds ratio; MD: Mean difference

### Explanations

- a. Single study to support this outcome
- b. Wide Confidence intervals

Summary of findings:

**RFVII compared to FFP and Vit K for ICH occurring during use of VKA**

**Patient or population:** ICH occurring during use of VKA

**Setting:**

**Intervention:** rFVII

**Comparison:** FFP and Vit K

| Outcomes           | Anticipated absolute effects* (95% CI)         |                                                                                                    | Relative effect (95% CI)       | № of participants (studies) | Certainty of the evidence (GRADE) | Comments |
|--------------------|------------------------------------------------|----------------------------------------------------------------------------------------------------|--------------------------------|-----------------------------|-----------------------------------|----------|
|                    | Risk with FFP and Vit K                        | Risk with rFVII                                                                                    |                                |                             |                                   |          |
| Mortality          | 176 per 1,000                                  | <b>355 per 1,000</b> (159 to 617)                                                                  | <b>OR 2.57</b> (0.88 to 7.52)  | 79 (1 observational study)  | ⊕⊕○○<br>LOW <sup>a</sup>          |          |
| INR, 3 and 6 h     | The mean INR, 3 and 6 h was <b>0</b>           | The mean INR, 3 and 6 h in the intervention group was 0.41 lower (0.55 lower to 0.27 lower)        | -                              | 79 (1 observational study)  | ⊕○○○<br>VERY LOW <sup>a</sup>     |          |
| Stroke             | 0 per 1,000                                    | <b>0 per 1,000</b> (0 to 0)                                                                        | <b>OR 2.33</b> (0.09 to 58.88) | 79 (1 observational study)  | ⊕○○○<br>VERY LOW <sup>a,b</sup>   |          |
| Thrombembolism     | 88 per 1,000                                   | <b>22 per 1,000</b> (2 to 186)                                                                     | <b>OR 0.23</b> (0.02 to 2.36)  | 79 (1 observational study)  | ⊕○○○<br>VERY LOW <sup>a,b</sup>   |          |
| Transfusion of FFP | The mean transfusion of FFP was <b>0</b> Units | The mean transfusion of FFP in the intervention group was 2 Units lower (3.53 lower to 0.47 lower) | -                              | 79 (1 observational study)  | ⊕○○○<br>VERY LOW <sup>a</sup>     |          |

\*The risk in the intervention group (and its 95% confidence interval) is based on the assumed risk in the comparison group and the **relative effect** of the intervention (and its 95% CI).

CI: Confidence interval; OR: Odds ratio; MD: Mean difference

**GRADE Working Group grades of evidence**

**High certainty:** We are very confident that the true effect lies close to that of the estimate of the effect

**Moderate certainty:** We are moderately confident in the effect estimate: The true effect is likely to be close to the estimate of the effect, but there is a possibility that it is substantially different

**Low certainty:** Our confidence in the effect estimate is limited: The true effect may be substantially different from the estimate of the effect

**Very low certainty:** We have very little confidence in the effect estimate: The true effect is likely to be substantially different from the estimate of effect

**Explanations**

a. Single study to support this outcome

b. Wide Confidence intervals



Table: Effect of rFVIIa in patients with warfarin-associated intracranial hemorrhage

| Outcome                                      | Incidence (%)  |                | n (N)  | MD [95% CI]/ OR [95% CI] | I <sup>2</sup> | P value  |
|----------------------------------------------|----------------|----------------|--------|--------------------------|----------------|----------|
|                                              | rFVIIa         | FFP and Vit K  |        |                          |                |          |
| Mortality, in hospital                       | 36%<br>(16/45) | 18%<br>(6/34)  | 1 (79) | 2.57 [0.88, 7.52]        | NA             | 0.08     |
| Survival, after hematoma evacuation          | 38%<br>(17/45) | 18%<br>(6/34)  | 1 (79) | 2.83 [0.97, 8.24]        | NA             | 0.05     |
| Survival, after surgical hematoma evacuation | 31%<br>(14/45) | 12%<br>(4/34)  | 1 (79) | 3.39 [1.00, 11.46]       | NA             | 0.05     |
| Withdrawal of life threatening care          | 31%<br>(14/45) | 18%<br>(6/34)  | 1 (79) | 2.11 [0.71, 6.23]        | NA             | 0.17     |
| Stroke, overall                              | 2%<br>(1/45)   | 0%<br>(0/34)   | 1 (79) | 2.33 [0.09, 58.88]       | NA             | 0.38     |
| DVT/ PE                                      | 2%<br>(1/45)   | 9%<br>(3/34)   | 1 (79) | 0.23 [0.02, 2.36]        | NA             | 0.22     |
| Transfusion, FFP                             | 3±3.0          | 5±3.7          | 1 (79) | -2.00 [-3.53, -0.47]     | NA             | 0.003    |
| Troponin elevation                           | 47%<br>(21/45) | 41%<br>(14/34) | 1 (79) | 1.25 [0.51, 3.07]        | NA             | 0.63     |
| Troponin > 1ng/dL                            | 13%<br>(6/45)  | 6%<br>(2/34)   | 1 (79) | 2.46 [0.46, 13.04]       | NA             | 0.29     |
| New EKG changes                              | 42%<br>(19/45) | 18%<br>(6/34)  | 1 (79) | 3.41 [1.18, 9.86]        | NA             | 0.02     |
| Troponin elevation and EKG changes           | 4%<br>(2/45)   | 0%<br>(0/34)   | 1 (79) | 3.97 [0.18, 85.34]       | NA             | 0.38     |
| INR, initial                                 | 2.5±1.0        | 2.2±0.7        | 1 (79) | 0.25 [-0.12, 0.62]       | NA             | 0.36     |
| INR, 3 hr                                    | 1.0±0.3        | 1.6±0.7        | 1 (79) | -0.65 [-0.88, -0.42]     | NA             | 0.0001   |
| INR, 6 hr                                    | 1.1±0.3        | 1.5±0.3        | 1 (79) | -0.41 [-0.55, -0.27]     | NA             | < 0.0001 |

CI: Confidence interval; DVT/ PE: Deep vein thrombosis or pulmonary embolism; FFP: Fresh frozen plasma; I<sup>2</sup>: Heterogeneity; MD: Mean difference; n: Number of studies; N: Number of patients; p: Statistical significance value; OR: Odds Ratio

Figure: Effect of rFVIIa on mortality in patients with warfarin induced intracranial hemorrhage

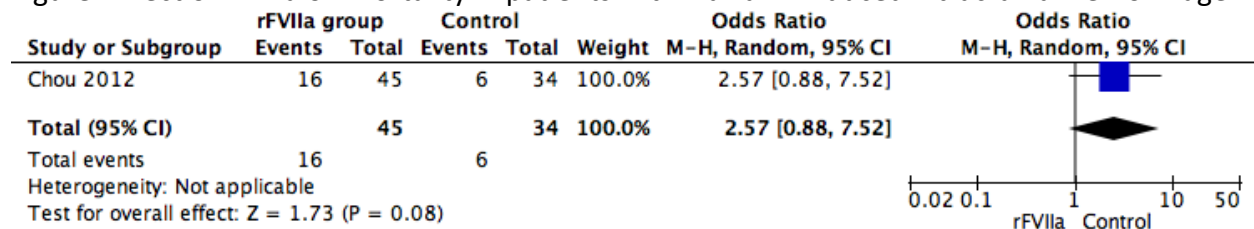

**PICO 12: In adult patients with ICH occurring during use of dabigatran etexilate (with drug levels assumed relevant for an effective anticoagulatory effect) does use of idarucizumab affect**

Author(s):

Date:

Question: Idarucizumab compared to Nothing for ICH occurring during use of dabigatran etexilate

Setting:

Bibliography:

| Certainty assessment |                       |                      |               |              |             |                                                  | № of patients  |         | Effect            |                   | Certainty             | Importance |
|----------------------|-----------------------|----------------------|---------------|--------------|-------------|--------------------------------------------------|----------------|---------|-------------------|-------------------|-----------------------|------------|
| № of studies         | Study design          | Risk of bias         | Inconsistency | Indirectness | Imprecision | Other considerations                             | Idarucizumab   | Nothing | Relative (95% CI) | Absolute (95% CI) |                       |            |
| Mortality            |                       |                      |               |              |             |                                                  |                |         |                   |                   |                       |            |
| 1                    | observational studies | serious <sup>a</sup> | not serious   | not serious  | not serious | publication bias strongly suspected <sup>b</sup> | 16/98 (16.3%)  |         | not estimable     |                   | ⊕○○○<br>○<br>VERY LOW | CRITICAL   |
| Adverse reactions    |                       |                      |               |              |             |                                                  |                |         |                   |                   |                       |            |
| 1                    | observational studies | serious <sup>a</sup> | not serious   | not serious  | not serious | publication bias strongly suspected <sup>b</sup> | 66/301 (21.9%) |         | not estimable     |                   | ⊕○○○<br>○<br>VERY LOW | CRITICAL   |

CI: Confidence interval

**Explanations**

a. Risk of bias

b. Single study to support this outcome

Summary of findings:

**Idarucizumab compared to Nothing for ICH occurring during use of dabigatran etexilate**

**Patient or population:** ICH occurring during use of dabigatran etexilate

**Setting:**

**Intervention:** Idarucizumab

**Comparison:** Nothing

| Outcomes          | Anticipated absolute effects* (95% CI) |                                | Relative effect (95% CI) | No of participants (studies)   | Certainty of the evidence (GRADE) | Comments |
|-------------------|----------------------------------------|--------------------------------|--------------------------|--------------------------------|-----------------------------------|----------|
|                   | Risk with Nothing                      | Risk with Idarucizumab         |                          |                                |                                   |          |
| Mortality         | 0 per 1,000                            | <b>0 per 1,000</b><br>(0 to 0) | not estimable            | 98<br>(1 observational study)  | ⊕○○○<br>VERY LOW <sup>a,b</sup>   |          |
| Adverse reactions | 0 per 1,000                            | <b>0 per 1,000</b><br>(0 to 0) | not estimable            | 301<br>(1 observational study) | ⊕○○○<br>VERY LOW <sup>a,b</sup>   |          |

\*The risk in the intervention group (and its 95% confidence interval) is based on the assumed risk in the comparison group and the relative effect of the intervention (and its 95% CI).

CI: Confidence interval

**GRADE Working Group grades of evidence**

**High certainty:** We are very confident that the true effect lies close to that of the estimate of the effect

**Moderate certainty:** We are moderately confident in the effect estimate: The true effect is likely to be close to the estimate of the effect, but there is a possibility that it is substantially different

**Low certainty:** Our confidence in the effect estimate is limited: The true effect may be substantially different from the estimate of the effect

**Very low certainty:** We have very little confidence in the effect estimate: The true effect is likely to be substantially different from the estimate of effect

**Explanations**

a. Risk of bias

b. Single study to support this outcome

Table: Effect of idarucizumab in patients with dabigatran-associated intracranial hemorrhage

| Outcome                        | Incidence (%)   |         | n (N)   | OR [95% CI] | I <sup>2</sup> | P value |
|--------------------------------|-----------------|---------|---------|-------------|----------------|---------|
|                                | Idarucizumab    | Control |         |             |                |         |
| Mortality                      | 16%<br>(16/98)  | NR      | 1 (98)  | NA          | NA             | NA      |
| Success                        | 100%<br>(98/98) | NR      | 1 (98)  | NA          | NA             | NA      |
| Adverse reactions <sup>a</sup> | 22%<br>(66/301) | NR      | 1 (301) | NA          | NA             | NA      |

a: Considered patients with ICH and other bleeding; I<sup>2</sup>: Heterogeneity; n: Number of studies; N: Number of patients; p: Statistical significance value; OR: Odds Ratio  
Pollack et al 2017

**PICO 13: In adult patients with ICH occurring during use of a fXa inhibitor (with drug levels assumed relevant for an effective anticoagulatory effect) does use of andexanet improve the outcomes**

Author(s):

Date:

Question: Andexanet compared to Nothing for ICH occurring during use of a fXa inhibitor

Setting:

Bibliography:

| Certainty assessment                |                       |                      |               |              |             |                                                  | № of patients |         | Effect            |                   | Certainty             | Importance |
|-------------------------------------|-----------------------|----------------------|---------------|--------------|-------------|--------------------------------------------------|---------------|---------|-------------------|-------------------|-----------------------|------------|
| № of studies                        | Study design          | Risk of bias         | Inconsistency | Indirectness | Imprecision | Other considerations                             | Andexanet     | Nothing | Relative (95% CI) | Absolute (95% CI) |                       |            |
| Mortality                           |                       |                      |               |              |             |                                                  |               |         |                   |                   |                       |            |
| 1                                   | observational studies | serious <sup>a</sup> | not serious   | not serious  | not serious | publication bias strongly suspected <sup>b</sup> | 10/67 (14.9%) |         | not estimable     |                   | ⊕○○○<br>○<br>VERY LOW | CRITICAL   |
| Thrombotic event and death, 30 days |                       |                      |               |              |             |                                                  |               |         |                   |                   |                       |            |
| 1                                   | observational studies | serious <sup>a</sup> | not serious   | not serious  | not serious | publication bias strongly suspected <sup>b</sup> | 12/67 (17.9%) |         | not estimable     |                   | ⊕○○○<br>○<br>VERY LOW | CRITICAL   |

CI: Confidence interval

**Explanations**

a. Risk of bias

b. Single study to support this outcome

Summary of findings:

## Andexanet compared to Nothing for ICH occurring during use of a fXa inhibitor

**Patient or population:** ICH occurring during use of a fXa inhibitor

**Setting:**

**Intervention:** Andexanet

**Comparison:** Nothing

| Outcomes                                     | Anticipated absolute effects*<br>(95% CI) |                                | Relative effect<br>(95% CI) | No of<br>participants<br>(studies)  | Certainty of the<br>evidence<br>(GRADE) | Comments |
|----------------------------------------------|-------------------------------------------|--------------------------------|-----------------------------|-------------------------------------|-----------------------------------------|----------|
|                                              | Risk with<br>Nothing                      | Risk with<br>Andexanet         |                             |                                     |                                         |          |
| Mortality                                    | 0 per 1,000                               | <b>0 per 1,000</b><br>(0 to 0) | not estimable               | 67<br>(1<br>observational<br>study) | ⊕○○○<br>VERY LOW <sup>a,b</sup>         |          |
| Thrombotic<br>event and<br>death, 30<br>days | 0 per 1,000                               | <b>0 per 1,000</b><br>(0 to 0) | not estimable               | 67<br>(1<br>observational<br>study) | ⊕○○○<br>VERY LOW <sup>a,b</sup>         |          |

\*The risk in the intervention group (and its 95% confidence interval) is based on the assumed risk in the comparison group and the relative effect of the intervention (and its 95% CI).

CI: Confidence interval

### GRADE Working Group grades of evidence

**High certainty:** We are very confident that the true effect lies close to that of the estimate of the effect

**Moderate certainty:** We are moderately confident in the effect estimate: The true effect is likely to be close to the estimate of the effect, but there is a possibility that it is substantially different

**Low certainty:** Our confidence in the effect estimate is limited: The true effect may be substantially different from the estimate of the effect

**Very low certainty:** We have very little confidence in the effect estimate: The true effect is likely to be substantially different from the estimate of effect

## Explanations

a. Risk of bias

b. Single study to support this outcome

Table: Effect of idarucizumab in patients with dabigatran-associated intracranial hemorrhage

| Outcome                                                                  | Incidence (%) |         | n (N)  | OR [95% CI] | I <sup>2</sup> | P value |
|--------------------------------------------------------------------------|---------------|---------|--------|-------------|----------------|---------|
|                                                                          | Andexanet     | Control |        |             |                |         |
| Mortality                                                                | 15% (10/67)   | NR      | 1 (67) | NA          | NA             | NA      |
| Thrombotic events and death, during 30 days of follow up                 | 18% (12/67)   | NR      | 1 (67) | NA          | NA             | NA      |
| Excellent or good hemostatic efficacy, 12 hours after andexanet infusion | 79% (37/47)   | NR      | 1 (47) | NA          | NA             | NA      |
| Change in Xa factor activity in patients receiving rivaroxaban           | 89%           | NA      | 1 (47) | 89% [58-94] | NA             | NA      |
| Change in Xa factor activity in patients receiving apixaban              | 93%           | NA      | 1 (47) | 93% [87-94] | NA             | NA      |

CI: Confidence intervals; I<sup>2</sup>: Heterogeneity; n: Number of studies; N: Number of patients; p: Statistical significance value; OR: Odds Ratio

Connolly et al

Table: Effect of FFP on all-cause mortality in patients with warfarin-associated intracranial hemorrhage

| Outcome              | Incidence (%)    |                  | n (N)      | OR [95% CI]       | I <sup>2</sup> | P value  |
|----------------------|------------------|------------------|------------|-------------------|----------------|----------|
|                      | FFP              | Control          |            |                   |                |          |
| FFP vs Control       | 46%<br>(172/377) | 62%<br>(280/454) | 1<br>(831) | 0.52 [0.40, 0.69] | NA             | <0.00001 |
| FFP & PCC vs Control | 27%<br>(36/131)  | 62%<br>(280/454) | 1<br>(585) | 0.24 [0.15, 0.36] | NA             | <0.00001 |

FFP: Fresh frozen plasma; I<sup>2</sup>: Heterogeneity; n: Number of studies; N: Number of patients; p: Statistical significance value; PCC: Prothrombin complex concentrate; OR: Odds Ratio

Figure: Effect of FFP vs placebo on mortality in patients with warfarin-associated intracranial hemorrhage

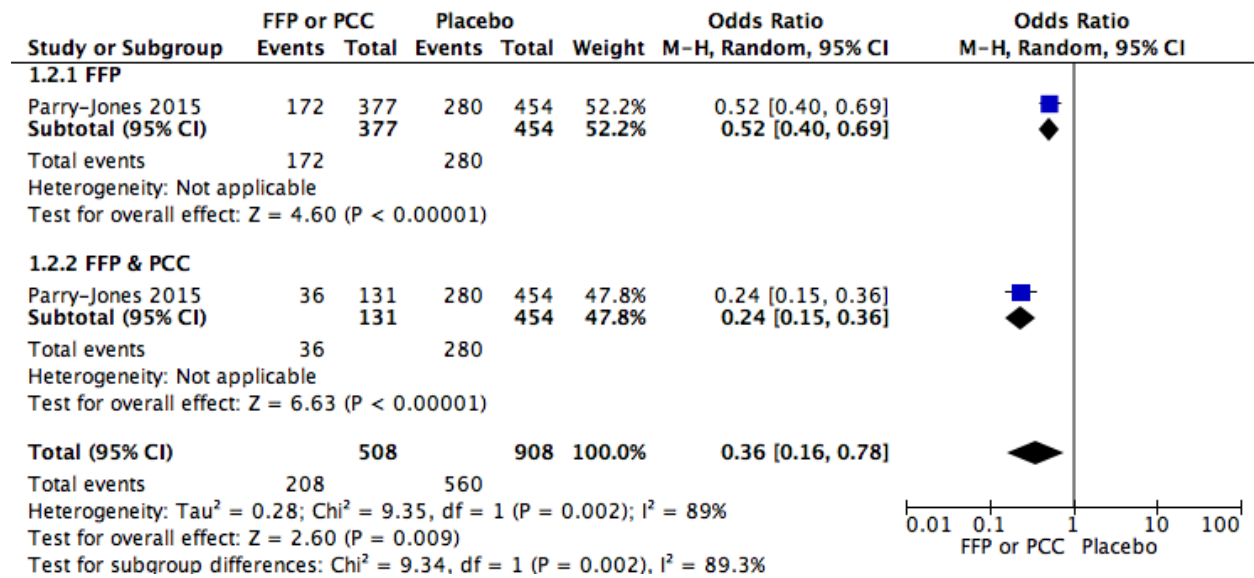

Supplement: Supplemental_Material2.pdf [file Supplemental_Material2.pdf]
