# Supplementary material
Source: PubMed Central journal article supplement (PMC6921939)
Supplement: Supplemental_Material1.pdf [file Supplemental_Material1.pdf]

## **Grading of outcomes was established based on a Delphi method vote.**

Mortality: 9

Disability: 9

SAE: 8

Reversal: 6

Hematoma expansion: 6

## **PICO working groups**

PICO 1: CO and HC

PICO 2: CO and HC

PICO 3: JK, DT and HC

PICO 4 JP and HC

PICO 5: CO and TS

PICO 6: JP and CC

PICO 7: JP and CC

PICO 8: CC and HC

PICO 9: DT and TS

PICO 10: DT and TS

## **Search strategy of OAC**

### **PICOs 1,2,6**

("Cerebral hemorrhage" OR "ICH" OR "intracerebral hemorrhage" OR "intra-cerebral hemorrhage" OR "Brain hemorrhage") AND ("Vitamin K antagonist\*" OR "Warfarin" OR "Vitamin K inhibitor\*" OR "coumadin" OR "phenprocoumon OR acenocoumarol OR dicoumarol OR fluindione or phenindione" OR "NOAC" OR "direct oral anticoagulant\*" OR "non-vitamin K antagonist oral anticoagulant\*" OR "Dabigatran" OR "Pradaxa" OR "edoxaban" OR "savaysa" OR "Xa inhibitor\*" OR "factor Xa inhibitor\*" OR "fXa inhibitor\*" OR "Rivaroxaban" OR "Xarelto" OR "Apixaban" OR "Eliquis" OR "betrixaban") AND ("Factor 3 PCC" OR "factor 4 PCC" OR "Prothrombin complex concentrate" OR "PCC" OR "Factor II" OR "Factor VII" OR "RFVII" OR "Recombinant factor VII" OR "recombinant activated factor VII" OR "rFVIIa" OR "factor IX" OR "Factor X" OR "3-factor PCC" OR "4-factor PCC" OR "Fresh frozen plasma" OR "FFP" OR "tranexamic acid" OR "Lysteda" OR placebo") AND "Randomized Controlled Trial\*" OR "random allocation" OR "Controlled Clinical Trial\*" OR "control group\*" OR "clinical trial\*" OR "double-blind method" OR "single-blind method" OR "random" OR "RCT or RCTs" OR "controlled trial\*" OR "quasi-random\*" OR "quasi random\*" OR "pseudo-random\*" OR "pseudo random\*"

### **PICOs 3,4,5**

("Cerebral hemorrhage" OR "ICH" OR "intracerebral hemorrhage" OR "intra-cerebral hemorrhage" OR "Brain hemorrhage") AND ("Vitamin K antagonist\*" OR "Warfarin" OR "Vitamin K inhibitor\*" OR "coumadin" OR "phenprocoumon OR acenocoumarol OR dicoumarol OR fluindione or phenindione") AND ("Vitamin K" OR "RFVII" OR "Recombinant factor VII" OR "Fresh frozen plasma" OR "FFP" OR "placebo") AND ("Randomized Controlled Trial\*" OR "random allocation" OR

“Controlled Clinical Trial\*” OR “control group\*” OR “clinical trial\*” OR “double-blind method” OR “single-blind method” OR “random” OR “RCT or RCTs” OR “controlled trial\*” OR “quasi-random\*” OR “quasi random\*” OR “pseudo-random\*” OR “pseudo random\*”)

**PICO 7**

(“Cerebral hemorrhage” OR “ICH” OR “intracerebral hemorrhage” OR “intra-cerebral hemorrhage” OR “Brain hemorrhage”) AND (“NOAC” OR “Dabigatran” OR “Pradaxa”) AND (“idarucizumab” OR “Praxbind”) AND (“Randomized Controlled Trial\*” OR “random allocation” OR “Controlled Clinical Trial\*” OR “control group\*” OR “clinical trial\*” OR “double-blind method” OR “single-blind method” OR “random” OR “RCT or RCTs” OR “controlled trial\*” OR “quasi-random\*” OR “quasi random\*” OR “pseudo-random\*” OR “pseudo random\*”)

**PICO 8**

(“Cerebral hemorrhage” OR “ICH” OR “intracerebral hemorrhage” OR “intra-cerebral hemorrhage” OR “Brain hemorrhage”) AND (“factor Xa inhibitor\*” OR “fXa inhibitor\*” OR “Xa inhibitor\*” OR “rivaroxaban” OR “edoxaban” OR “Apixaban”) AND (“andexanet OR aripazine OR ciraparantag OR PER977 OR Placebo”) AND (“Randomized Controlled Trial\*” OR “random allocation” OR “Controlled Clinical Trial\*” OR “control group\*” OR “clinical trials” OR “double-blind method” OR “single-blind method” OR “random” OR “RCT or RCTs” OR “controlled trial\*” OR “quasi-random\*” OR “quasi random\*” OR “pseudo-random\*” OR “pseudo random\*”)
